# Supplementary material for: Theoretical investigation of the structures, stabilities, and vibrational and rotational spectroscopic parameters of linear HOMgNC and HMgNCO molecules by density functional theory and coupled-cluster method
Source: Royal Society of Chemistry journal article supplement (doi:10.1039/d2nj00715k), 2022-01-01
Supplement: d2nj00715k1.pdf [file d2nj00715k1.pdf]

## New Journal of Chemistry

### Electronic Supplementary Information

**Theoretical investigation of the structures, stabilities, and vibrational and rotational spectroscopic parameters of linear HOMgNC and HMgNCO molecules by density functional theory and coupled-cluster method**

Jie Bai, Hai-Tao Yu\*

*School of Chemistry and Materials Science, Heilongjiang University, Harbin 150080, P. R. China*

**E-mail: [yuhaitao@hlju.edu.cn](mailto:yuhaitao@hlju.edu.cn)**

## Table of Contents

|                                                                                                                                                                                                                                                                                                                                                                                                                                                                                        |     |
|----------------------------------------------------------------------------------------------------------------------------------------------------------------------------------------------------------------------------------------------------------------------------------------------------------------------------------------------------------------------------------------------------------------------------------------------------------------------------------------|-----|
| <b>Figure S1</b> Structures of the singlet isomers for the [H,Mg,N,C,O] system optimized at the M06-2X/aug-cc-pVTZ level of theory. ....                                                                                                                                                                                                                                                                                                                                               | S1  |
| <b>Figure S2</b> Structures of the singlet transition states for the [H,Mg,N,C,O] system optimized at the M06-2X/aug-cc-pVTZ level of theory. ....                                                                                                                                                                                                                                                                                                                                     | S2  |
| <b>Figure S3</b> Structures of the triplet isomers for the [H,Mg,N,C,O] system optimized at the M06-2X/aug-cc-pVTZ level of theory. ....                                                                                                                                                                                                                                                                                                                                               | S3  |
| <b>Figure S4</b> Structures of the triplet transition states for the [H,Mg,N,C,O] system optimized at the M06-2X/aug-cc-pVTZ level of theory. ....                                                                                                                                                                                                                                                                                                                                     | S4  |
| <b>Figure S5</b> Triplet reaction potential energy profile of the [H,Mg,N,C,O] system constructed at the M06-2X/aug-cc-pVTZ level of theory. ....                                                                                                                                                                                                                                                                                                                                      | S5  |
| <b>Figure S6</b> IRC analysis of several typical pathways to low-lying isomers computed at the M06-2X/aug-cc-pVTZ level of theory. ....                                                                                                                                                                                                                                                                                                                                                | S6  |
| <b>Figure S7</b> Valence molecule orbital pictures computed at the M06-2X/aug-cc-pVTZ level of theory. ....                                                                                                                                                                                                                                                                                                                                                                            | S7  |
| <b>Figure S8</b> Geometry parameters of the isomers <b>1</b> , <b>2</b> , <b>3</b> , and <b>4</b> and several reference molecules optimized at various levels of theory. ....                                                                                                                                                                                                                                                                                                          | S8  |
| <b>Figure S9</b> Character analysis of H-O hybrid orbit using the NBO technique computed at the CCSD(T)/cc-pVQZ level of theory.....                                                                                                                                                                                                                                                                                                                                                   | S9  |
| <b>Table S1</b> Total electronic energies with ZPVE correction (E, in a.u.), ZPVE (in a.u.), enthalpies (H, in a.u., 298.15 K), and Gibbs free energies (G, in a.u., 298.15 K) of the [H,Mg,N,C,O] isomers and TSs in electronic singlet states computed at the M06-2X/aug-cc-pVTZ level of theory.....                                                                                                                                                                                | S10 |
| <b>Table S2</b> Relative electronic energies with ZPVE correction ( $\Delta E$ , in kcal mol <sup>-1</sup> ), relative enthalpies ( $\Delta H$ , in kcal mol <sup>-1</sup> , 298.15 K), and relative Gibbs free energies ( $\Delta G$ , in kcal mol <sup>-1</sup> , 298.15 K) of the [H,Mg,N,C,O] isomers and TSs in electronic singlet states computed at the M06-2X/aug-cc-pVTZ level of theory. These values were calculated with respect to the lowest-lying isomer <b>1</b> ..... | S11 |
| <b>Table S3</b> Total electronic energies with ZPVE correction (E, in a.u.), ZPVE (in a.u.), enthalpies (H, in a.u., 298.15 K), and Gibbs free energies (G, in a.u., 298.15 K) of the [H,Mg,N,C,O] isomers and TSs in electronic triplet states computed at the M06-2X/aug-cc-pVTZ level of theory.....                                                                                                                                                                                | S12 |
| <b>Table S4</b> Relative electronic energies with ZPVE correction ( $\Delta E$ , in kcal mol <sup>-1</sup> ), relative enthalpies ( $\Delta H$ , in kcal mol <sup>-1</sup> , 298.15 K), and relative Gibbs free energies ( $\Delta G$ , in kcal mol <sup>-1</sup> , 298.15 K) of the [H,Mg,N,C,O] isomers and TSs in electronic triplet states computed at the M06-2X/aug-cc-pVTZ level of theory. These values were calculated with respect to the lowest-lying isomer <b>1</b> ..... | S13 |
| <b>Table S5</b> Total electronic energies with ZPVE correction (E, in a.u.) of the isomers <b>1</b> , <b>2</b> , <b>3</b> , and <b>4</b> at various levels of theory.....                                                                                                                                                                                                                                                                                                              | S14 |
| <b>Table S6</b> Relative energies of the isomers <b>1</b> , <b>2</b> , <b>3</b> , and <b>4</b> with ZPVE correction computed at various levels of theory.....                                                                                                                                                                                                                                                                                                                          | S15 |
| <b>Table S7</b> Imaginary frequency number at various levels of theory. When the optimization towards <b>2</b> leads to the linear structure <b>1</b> , the virgule symbol ‘/’ is used.....                                                                                                                                                                                                                                                                                            | S16 |
| <b>Table S8</b> Basin charge, AIM charge, natural population charge (NPC), and Mulliken charge of the isomers <b>1</b> , <b>2</b> , <b>3</b> , <b>4</b> , and reference molecules computed at the CCSD(T)/cc-pVQZ level of theory.....                                                                                                                                                                                                                                                 | S18 |
| <b>Table S9</b> ELF values at BCPs for <b>1</b> , <b>2</b> , <b>3</b> , and <b>4</b> computed at the CCSD(T)/aug-cc-pVTZ level of theory.....                                                                                                                                                                                                                                                                                                                                          | S20 |
| <b>Table S10</b> Local topological properties (in a.u.) of the electronic charge density distribution at BCPs for <b>1</b> , <b>2</b> , <b>3</b> , and <b>4</b> computed at the CCSD(T)/aug-cc-pVTZ level of theory.....                                                                                                                                                                                                                                                               | S21 |
| <b>Table S11</b> Cartesian coordinates of all located stationary points optimized at the M06-2X/aug-cc-pVTZ level of theory.....                                                                                                                                                                                                                                                                                                                                                       | S22 |

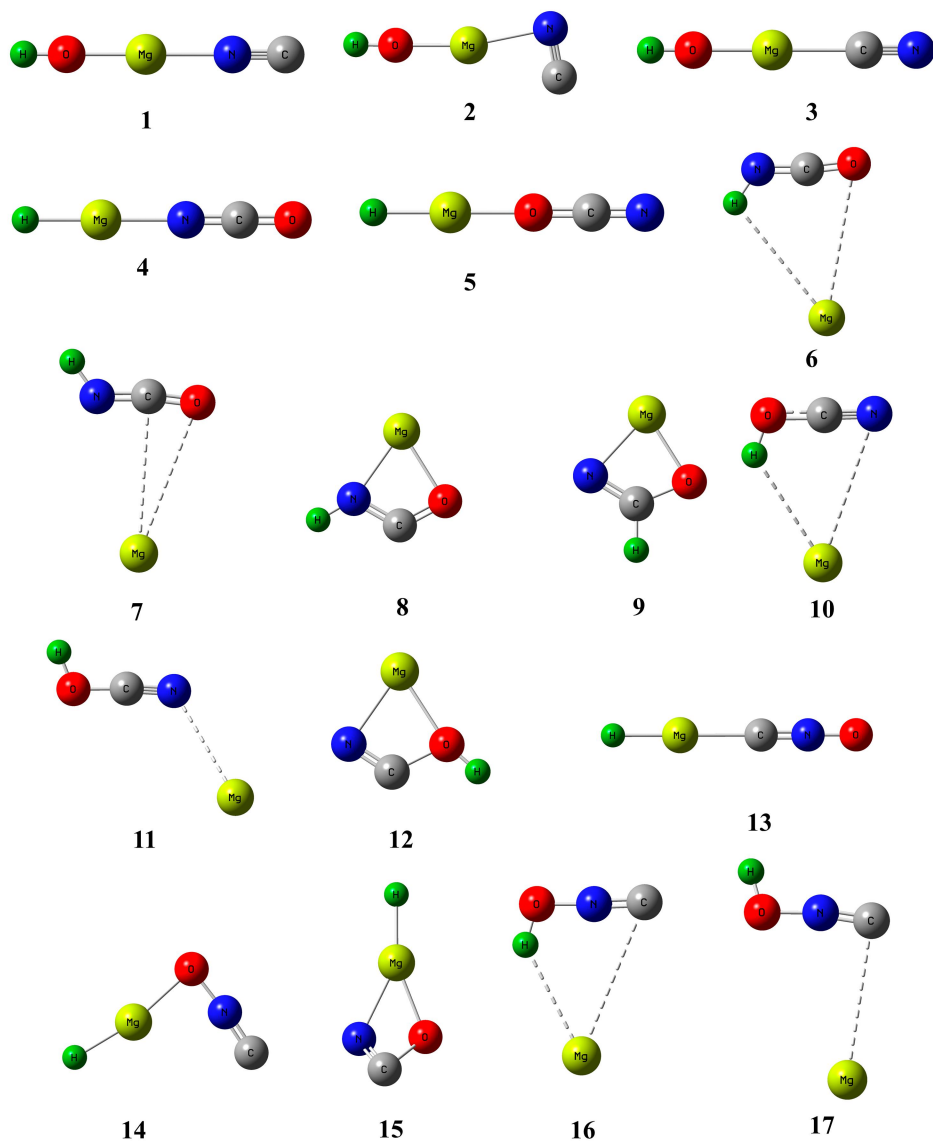

**Figure S1** Structures of the singlet isomers for the  $[H,Mg,N,C,O]$  system optimized at the M06-2X/*aug-cc-pVTZ* level of theory.

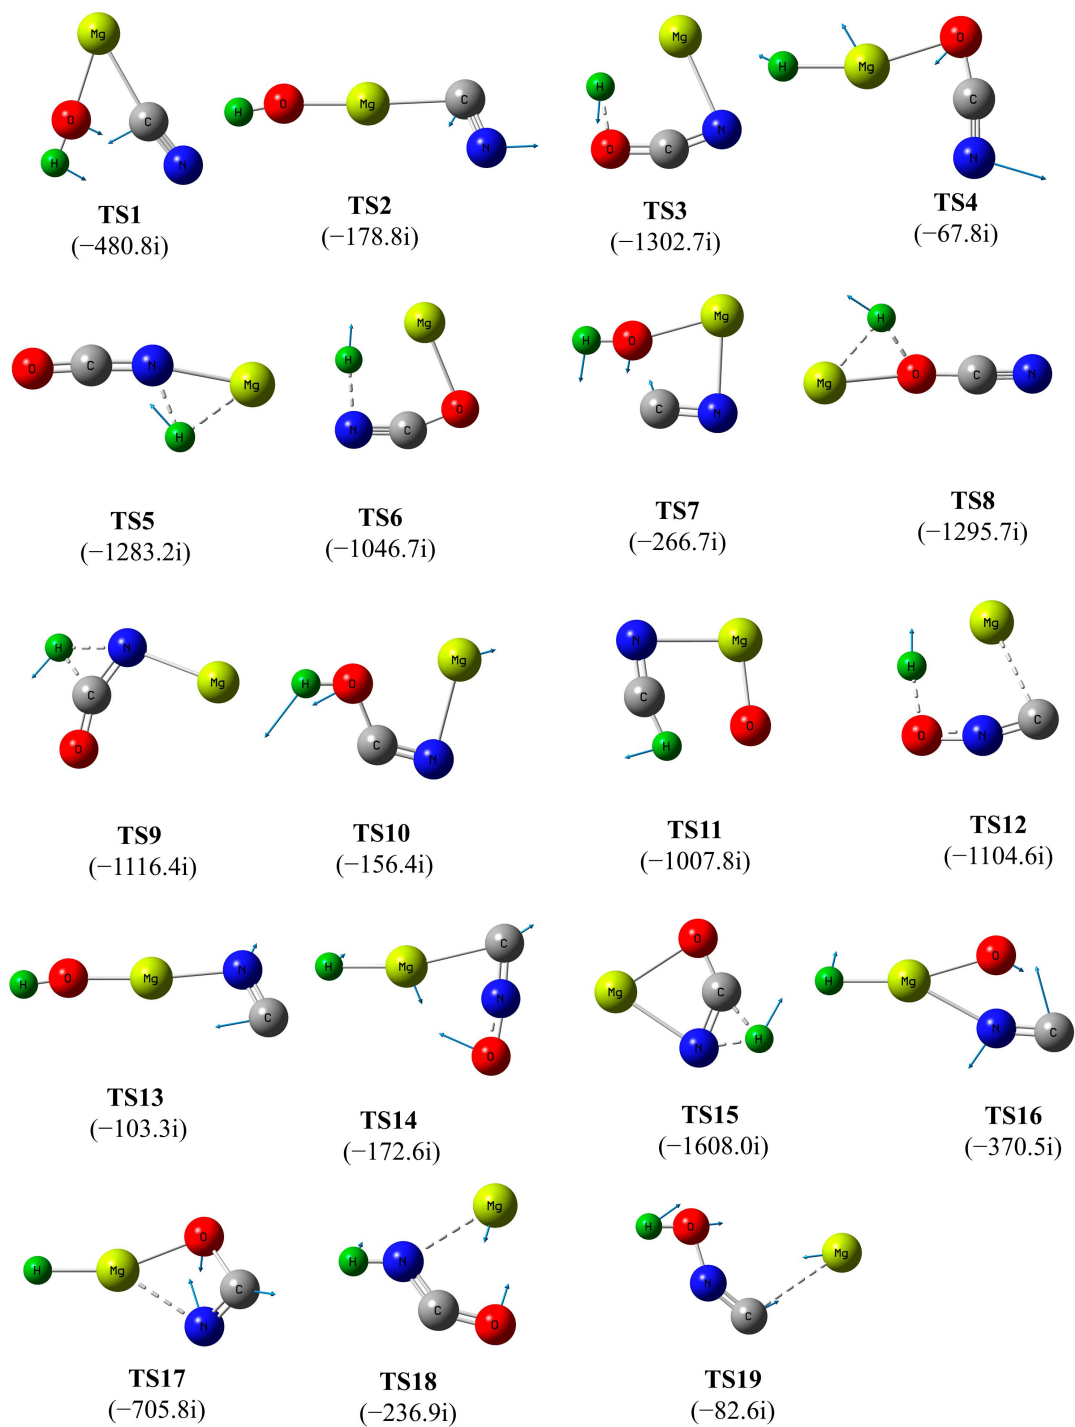

**Figure S2** Structures of the singlet transition states for the [H,Mg,N,C,O] system optimized at the M06-2X/aug-cc-pVTZ level of theory.

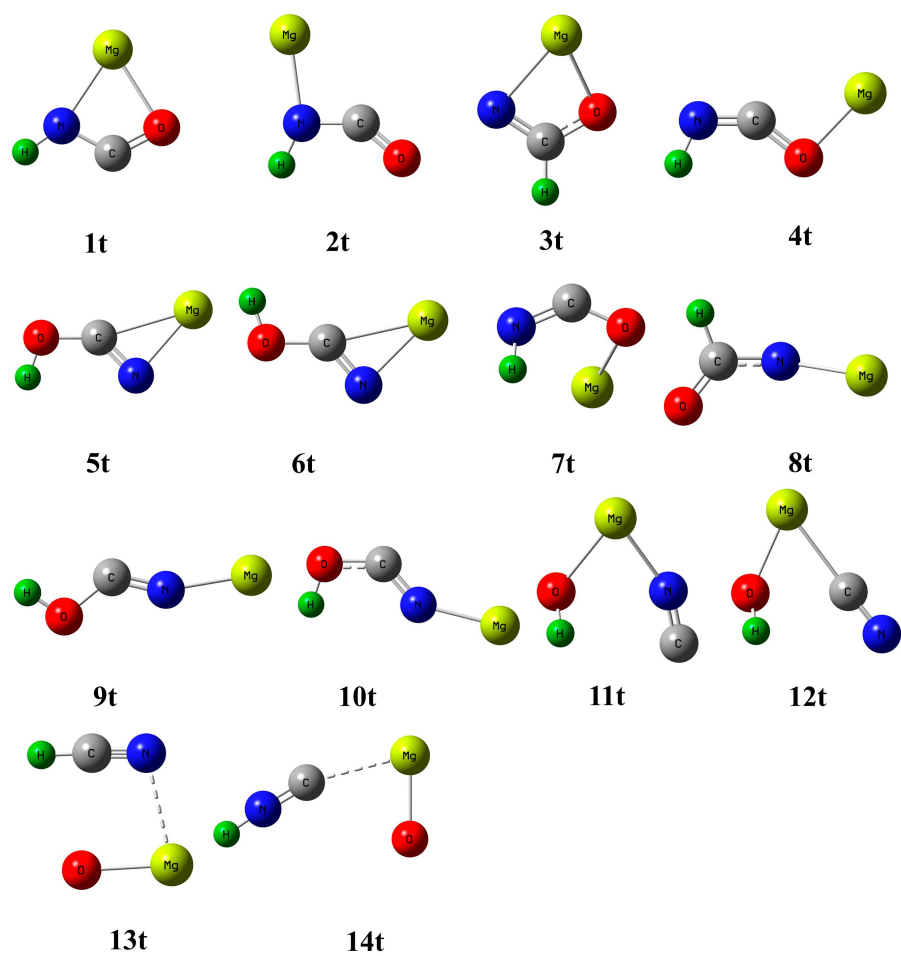

**Figure S3** Structures of the triplet isomers for the [H,Mg,N,C,O] system optimized at the M06-2X/*aug-cc-pVTZ* level of theory.

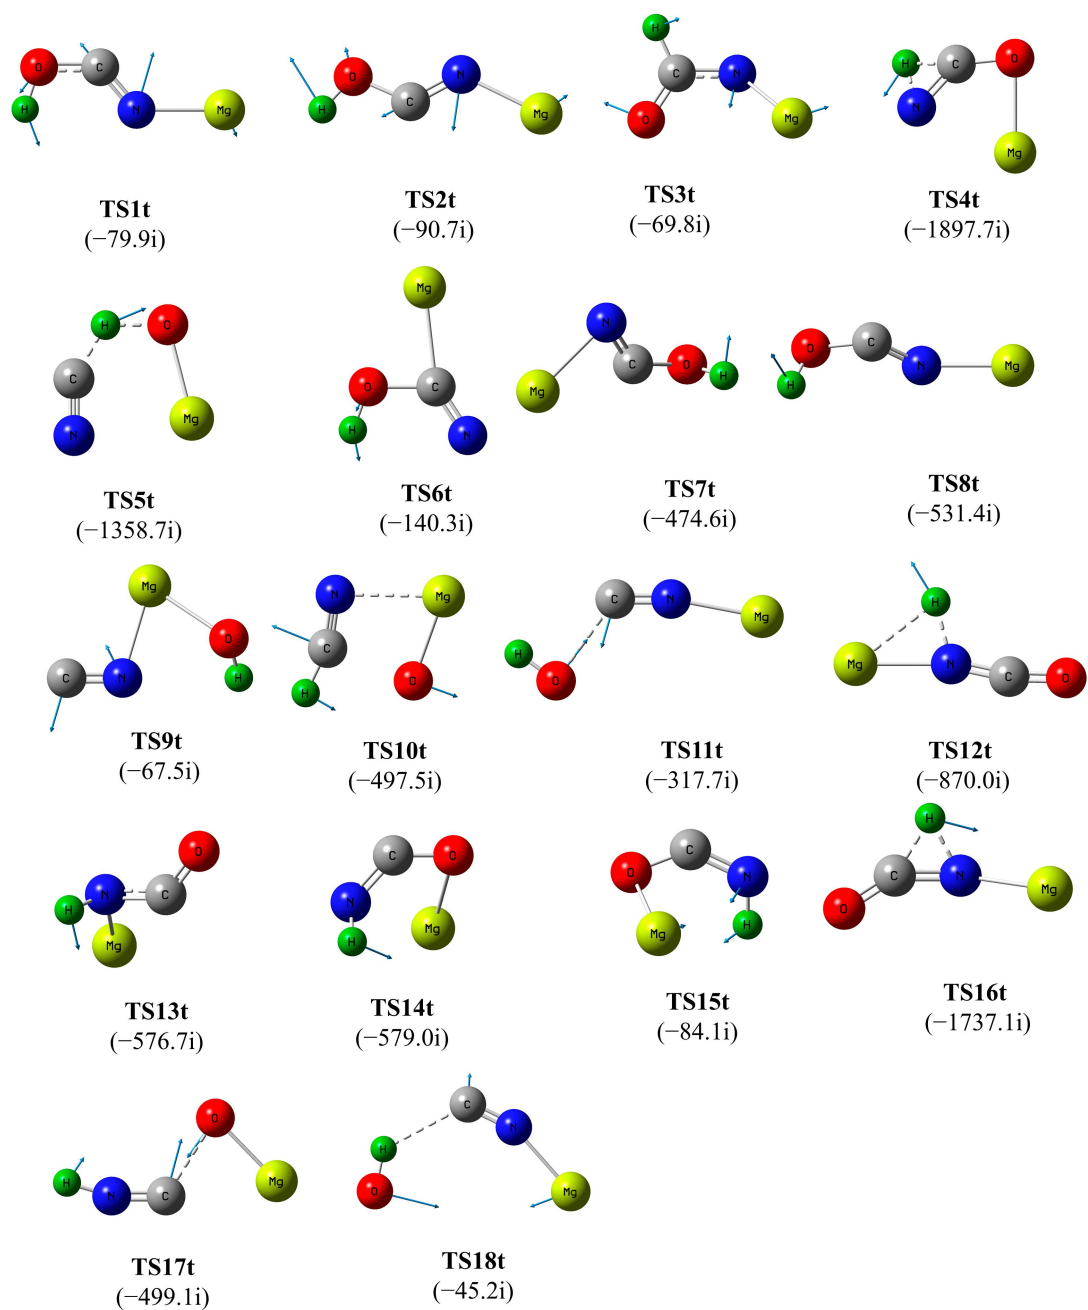

**Figure S4** Structures of the triplet transition states for the [H,Mg,N,C,O] system optimized at the M06-2X/aug-cc-pVTZ level of theory.

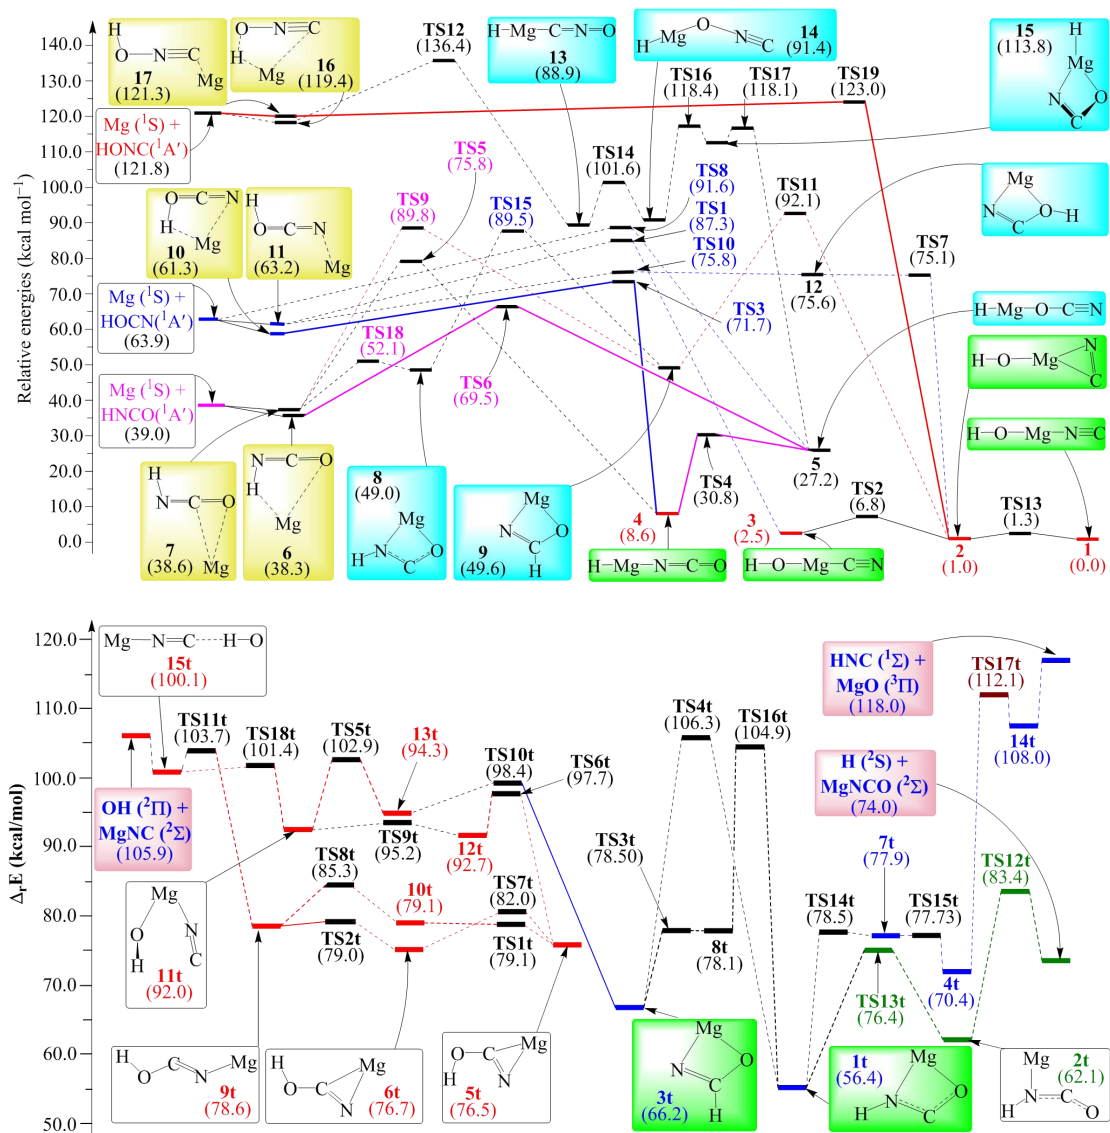

**Figure S5** Singlet and triplet reaction potential energy profiles of the [H,Mg,N,C,O] system constructed at the M06-2X/aug-cc-pVTZ level of theory.

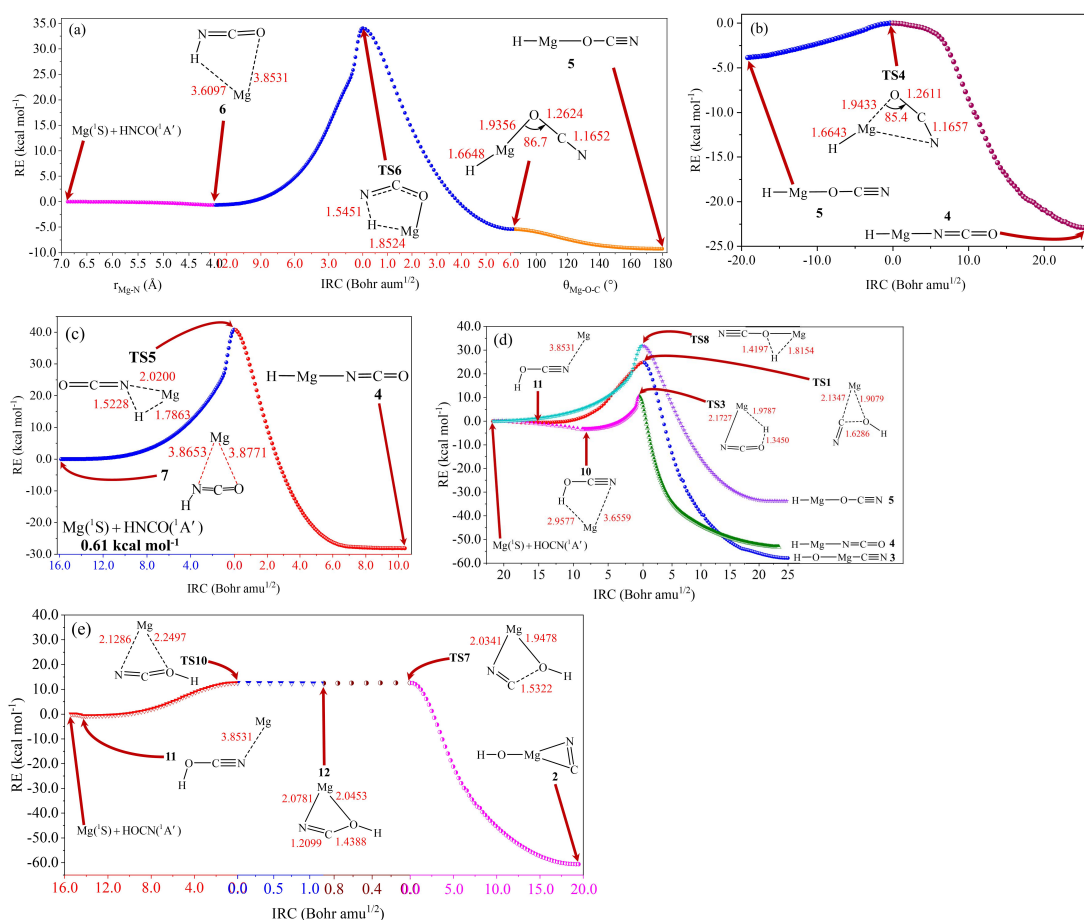

**Figure S6** IRC analysis of several typical pathways to low-lying isomers computed at the M06-2X/aug-cc-pVTZ level of theory.



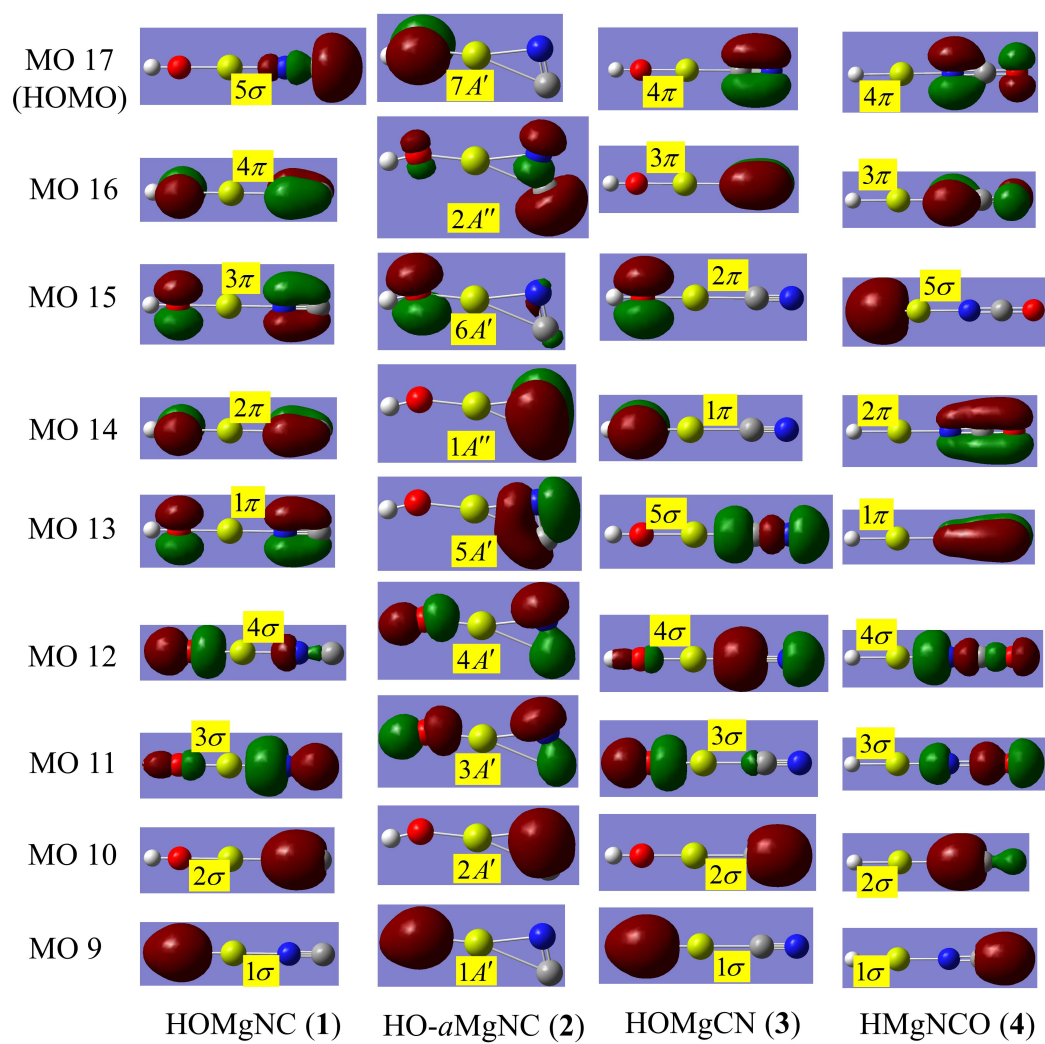

**Figure S7** Valence molecule orbital pictures computed at the M06-2X/aug-cc-pVTZ level of theory.

|                                     | 1               |                  |                  |                 | 2               |                  |                  |                 |                   |                   |                   |
|-------------------------------------|-----------------|------------------|------------------|-----------------|-----------------|------------------|------------------|-----------------|-------------------|-------------------|-------------------|
|                                     | r <sub>HO</sub> | r <sub>OMg</sub> | r <sub>MgN</sub> | r <sub>NC</sub> | r <sub>HO</sub> | r <sub>OMg</sub> | r <sub>MgN</sub> | r <sub>NC</sub> | θ <sub>HOMg</sub> | θ <sub>OMgN</sub> | θ <sub>MgNC</sub> |
| M06-2X/cc-pVQZ                      | 0.946           | 1.742            | 1.905            | 1.169           | 0.946           | 1.742            | 1.979            | 1.171           | 176.2             | 168.3             | 89.5              |
| M06-2X/cc-pV5Z                      | 0.946           | 1.740            | 1.904            | 1.169           | 0.946           | 1.741            | 1.980            | 1.171           | 176.0             | 168.1             | 89.1              |
| M06-2X/aug-cc-pVTZ                  | 0.947           | 1.745            | 1.906            | 1.170           | 0.947           | 1.746            | 1.984            | 1.172           | 175.0             | 167.7             | 88.7              |
| M06-2X/aug-cc-pVQZ                  | 0.947           | 1.743            | 1.905            | 1.169           | 0.946           | 1.743            | 1.978            | 1.171           | 176.7             | 168.5             | 89.7              |
| M06-2X/aug-cc-pV5Z                  | 0.946           | 1.741            | 1.904            | 1.169           | 0.946           | 1.740            | 1.981            | 1.171           | 177.4             | 168.5             | 88.9              |
| MP2/6-311++G(2df,2pd)               | 0.947           | 1.761            | 1.928            | 1.185           | 0.947           | 1.763            | 2.027            | 1.191           | 174.1             | 164.8             | 84.6              |
| DSD-PBEP86-D3(BJ)/6-311++G(2df,2pd) | 0.947           | 1.754            | 1.916            | 1.180           | 0.947           | 1.756            | 1.993            | 1.184           | 170.6             | 166.8             | 89.2              |
| B2PLYPD3/6-311++G(2df,2pd)          | 0.947           | 1.754            | 1.914            | 1.178           | 0.948           | 1.757            | 1.970            | 1.182           | 168.8             | 168.8             | 94.8              |
| CCSD(T)/cc-pVQZ                     | 0.945           | 1.754            | 1.923            | 1.181           | 0.947           | 1.764            | 1.991            | 1.185           | 157.5             | 166.7             | 91.1              |
| CCSD(T)/cc-pV5Z                     | 0.945           | 1.753            | 1.921            | 1.180           | 0.946           | 1.757            | 1.985            | 1.184           | 167.6             | 167.7             | 92.1              |
| CCSD(T)/aug-cc-pVTZ                 | 0.949           | 1.761            | 1.927            | 1.184           | 0.950           | 1.772            | 1.992            | 1.189           | 157.5             | 166.8             | 91.5              |
| CCSD(T)/aug-cc-pVQZ                 | 0.946           | 1.757            | 1.923            | 1.181           | 0.947           | 1.762            | 1.988            | 1.185           | 165.0             | 167.8             | 91.9              |
| QCISD(T)/cc-pVQZ                    | 0.945           | 1.754            | 1.923            | 1.181           | 0.947           | 1.763            | 1.990            | 1.185           | 158.3             | 166.8             | 91.3              |
| QCISD(T)/cc-pV5Z                    | 0.946           | 1.753            | 1.921            | 1.181           | 0.946           | 1.758            | 1.982            | 1.183           | 166.6             | 167.9             | 92.4              |
| QCISD(T)/aug-cc-pVTZ                | 0.949           | 1.761            | 1.927            | 1.185           | 0.950           | 1.769            | 1.994            | 1.189           | 160.7             | 166.7             | 90.9              |
| QCISD(T)/aug-cc-pVQZ                | 0.946           | 1.757            | 1.923            | 1.182           | 0.947           | 1.762            | 1.987            | 1.186           | 165.2             | 167.9             | 92.2              |

  

|                                     | 3                |                  |                 |                 | 4               |                  |                  |                 |
|-------------------------------------|------------------|------------------|-----------------|-----------------|-----------------|------------------|------------------|-----------------|
|                                     | r <sub>HMg</sub> | r <sub>MgN</sub> | r <sub>NC</sub> | r <sub>CO</sub> | r <sub>HO</sub> | r <sub>OMg</sub> | r <sub>MgC</sub> | r <sub>CN</sub> |
| M06-2X/cc-pVQZ                      | 1.672            | 1.878            | 1.193           | 1.170           | 0.946           | 1.742            | 2.035            | 1.151           |
| M06-2X/cc-pV5Z                      | 1.672            | 1.877            | 1.193           | 1.170           | 0.946           | 1.741            | 2.034            | 1.151           |
| M06-2X/aug-cc-pVTZ                  | 1.673            | 1.879            | 1.193           | 1.172           | 0.947           | 1.745            | 2.035            | 1.152           |
| M06-2X/aug-cc-pVQZ                  | 1.671            | 1.878            | 1.193           | 1.170           | 0.947           | 1.743            | 2.034            | 1.151           |
| M06-2X/aug-cc-pV5Z                  | 1.670            | 1.877            | 1.193           | 1.170           | 0.946           | 1.741            | 2.034            | 1.151           |
| MP2/6-311++G(2df,2pd)               | 1.687            | 1.898            | 1.206           | 1.183           | 0.947           | 1.763            | 2.048            | 1.177           |
| DSD-PBEP86-D3(BJ)/6-311++G(2df,2pd) | 1.687            | 1.899            | 1.202           | 1.179           | 0.947           | 1.756            | 2.042            | 1.167           |
| B2PLYPD3/6-311++G(2df,2pd)          | 1.681            | 1.887            | 1.201           | 1.179           | 0.947           | 1.755            | 2.038            | 1.164           |
| CCSD(T)/cc-pVQZ                     | 1.693            | 1.894            | 1.202           | 1.179           | 0.946           | 1.755            | 2.052            | 1.167           |
| CCSD(T)/cc-pV5Z                     | 1.692            | 1.893            | 1.201           | 1.179           | 0.946           | 1.754            | 2.051            | 1.166           |
| CCSD(T)/aug-cc-pVTZ                 | 1.695            | 1.899            | 1.205           | 1.184           | 0.949           | 1.762            | 2.054            | 1.171           |
| CCSD(T)/aug-cc-pVQZ                 | 1.693            | 1.895            | 1.202           | 1.180           | 0.946           | 1.758            | 2.052            | 1.167           |
| QCISD(T)/cc-pVQZ                    | 1.693            | 1.894            | 1.202           | 1.180           | 0.946           | 1.755            | 2.052            | 1.167           |
| QCISD(T)/cc-pV5Z                    | 1.693            | 1.893            | 1.202           | 1.180           | 0.946           | 1.754            | 2.051            | 1.167           |
| QCISD(T)/aug-cc-pVTZ                | 1.696            | 1.899            | 1.205           | 1.185           | 0.949           | 1.762            | 2.054            | 1.171           |
| QCISD(T)/aug-cc-pVQZ                | 1.694            | 1.895            | 1.203           | 1.181           | 0.946           | 1.758            | 2.052            | 1.168           |

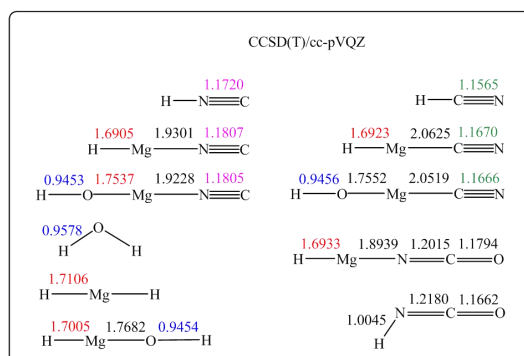

**Figure S8** Geometry parameters of the isomers 1, 2, 3, and 4 and several reference molecules optimized at various levels of theory.

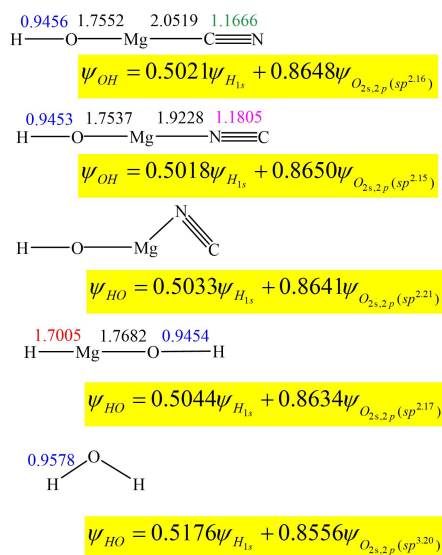

**Figure S9** Character analysis of H-O hybrid orbit using the NBO technique computed at the CCSD(T)/*cc-pVQZ* level of theory

**Table S1** Total electronic energies with ZPVE correction (E, in a.u.), ZPVE (in a.u.), enthalpies (H, in a.u., 298.15 K), and Gibbs free energies (G, in a.u., 298.15 K) of the [H,Mg,N,C,O] isomers and TSs in electronic singlet states computed at the M06-2X/aug-cc-pVTZ level of theory

| Species                                       | ZPVE     | E           | H           | G           |
|-----------------------------------------------|----------|-------------|-------------|-------------|
| 1                                             | 0.019205 | -368.786360 | -368.778674 | -368.814327 |
| 2                                             | 0.018606 | -368.784813 | -368.777207 | -368.814990 |
| 3                                             | 0.019640 | -368.782379 | -368.774867 | -368.809925 |
| 4                                             | 0.018596 | -368.772685 | -368.766532 | -368.798892 |
| 5                                             | 0.017821 | -368.743063 | -368.736642 | -368.770143 |
| 6                                             | 0.021864 | -368.725339 | -368.718759 | -368.756418 |
| 7                                             | 0.021834 | -368.724917 | -368.718259 | -368.756418 |
| 8                                             | 0.023059 | -368.708232 | -368.703199 | -368.734660 |
| 9                                             | 0.023180 | -368.707250 | -368.702585 | -368.733397 |
| 10                                            | 0.022511 | -368.688723 | -368.682435 | -368.718297 |
| 11                                            | 0.022275 | -368.685699 | -368.678910 | -368.717734 |
| 12                                            | 0.021065 | -368.665857 | -368.659905 | -368.693404 |
| 13                                            | 0.017889 | -368.644687 | -368.638485 | -368.670672 |
| 14                                            | 0.016090 | -368.640717 | -368.634588 | -368.668526 |
| 15                                            | 0.014236 | -368.605048 | -368.598800 | -368.632646 |
| 16                                            | 0.021372 | -368.596046 | -368.589346 | -368.626107 |
| 17                                            | 0.021314 | -368.593062 | -368.585994 | -368.626403 |
| Mg( <sup>1</sup> S) + HONC ( <sup>1</sup> A') | 0.020962 | -368.592314 | -368.587727 | -368.615661 |
| Mg( <sup>1</sup> S) + HOCN ( <sup>1</sup> A') | 0.021981 | -368.684574 | -368.680320 | -368.707671 |
| Mg( <sup>1</sup> S) + HNCO ( <sup>1</sup> A') | 0.021484 | -368.724294 | -368.720110 | -368.747175 |
| TS1                                           | 0.019861 | -368.647291 | -368.641707 | -368.674485 |
| TS2                                           | 0.018825 | -368.775580 | -368.768828 | -368.804461 |
| TS3                                           | 0.016754 | -368.672045 | -368.666997 | -368.698787 |
| TS4                                           | 0.017438 | -368.737312 | -368.732200 | -368.764046 |
| TS5                                           | 0.015865 | -368.665569 | -368.660568 | -368.691805 |
| TS6                                           | 0.016305 | -368.675551 | -368.670391 | -368.702366 |
| TS7                                           | 0.020086 | -368.666624 | -368.661163 | -368.693809 |
| TS8                                           | 0.015256 | -368.640449 | -368.634475 | -368.668834 |
| TS9                                           | 0.017008 | -368.643300 | -368.637833 | -368.670985 |
| TS10                                          | 0.021149 | -368.665515 | -368.660146 | -368.692663 |
| TS11                                          | 0.018694 | -368.639543 | -368.634147 | -368.666505 |
| TS12                                          | 0.015818 | -368.568943 | -368.563734 | -368.595773 |
| TS13                                          | 0.018584 | -368.784275 | -368.777492 | -368.813231 |
| TS14                                          | 0.016482 | -368.624507 | -368.619282 | -368.651306 |
| TS15                                          | 0.016106 | -368.643817 | -368.637902 | -368.673062 |
| TS16                                          | 0.013788 | -368.597744 | -368.591799 | -368.625214 |
| TS17                                          | 0.013314 | -368.598101 | -368.592105 | -368.625624 |
| TS18                                          | 0.021933 | -368.703285 | -368.698114 | -368.730295 |
| TS19                                          | 0.021114 | -368.590317 | -368.584448 | -368.618708 |

**Table S2** Relative electronic energies with ZPVE correction ( $\Delta E$ , in kcal mol<sup>-1</sup>), relative enthalpies ( $\Delta H$ , in kcal mol<sup>-1</sup>, 298.15 K), and relative Gibbs free energies ( $\Delta G$ , in kcal mol<sup>-1</sup>, 298.15 K) of the [H,Mg,N,C,O] isomers and TSs in electronic singlet states computed at the M06-2X/aug-cc-pVTZ level of theory. These values were calculated with respect to the lowest-lying isomer **1**

| Species                                       | $\Delta E$ | $\Delta H$ | $\Delta G$ |
|-----------------------------------------------|------------|------------|------------|
| <b>1</b>                                      | 0.0        | 0.0        | 0.0        |
| <b>2</b>                                      | 1.0        | 0.9        | -0.4       |
| <b>3</b>                                      | 2.5        | 2.4        | 2.8        |
| <b>4</b>                                      | 8.6        | 7.6        | 9.7        |
| <b>5</b>                                      | 27.2       | 26.4       | 27.7       |
| <b>6</b>                                      | 38.3       | 37.6       | 36.3       |
| <b>7</b>                                      | 38.6       | 37.9       | 36.3       |
| <b>8</b>                                      | 49.0       | 47.4       | 50.0       |
| <b>9</b>                                      | 49.6       | 47.7       | 50.8       |
| <b>10</b>                                     | 61.3       | 60.4       | 60.3       |
| <b>11</b>                                     | 63.2       | 62.6       | 60.6       |
| <b>12</b>                                     | 75.6       | 74.5       | 75.9       |
| <b>13</b>                                     | 88.9       | 88.0       | 90.1       |
| <b>14</b>                                     | 91.4       | 90.4       | 91.5       |
| <b>15</b>                                     | 113.8      | 112.9      | 114.0      |
| <b>16</b>                                     | 119.4      | 118.8      | 118.1      |
| <b>17</b>                                     | 121.3      | 120.9      | 117.9      |
| Mg( <sup>1</sup> S) + HONC ( <sup>1</sup> A') | 121.8      | 119.8      | 124.7      |
| Mg( <sup>1</sup> S) + HOCN ( <sup>1</sup> A') | 63.9       | 61.7       | 66.9       |
| Mg( <sup>1</sup> S) + HNCO ( <sup>1</sup> A') | 38.9       | 36.7       | 42.1       |
| <b>TS1</b>                                    | 87.3       | 85.9       | 87.8       |
| <b>TS2</b>                                    | 6.8        | 6.2        | 6.2        |
| <b>TS3</b>                                    | 71.7       | 70.1       | 72.5       |
| <b>TS4</b>                                    | 30.8       | 29.2       | 31.6       |
| <b>TS5</b>                                    | 75.8       | 74.1       | 76.9       |
| <b>TS6</b>                                    | 69.5       | 67.9       | 70.3       |
| <b>TS7</b>                                    | 75.1       | 73.7       | 75.6       |
| <b>TS8</b>                                    | 91.6       | 90.5       | 91.3       |
| <b>TS9</b>                                    | 89.8       | 88.4       | 89.9       |
| <b>TS10</b>                                   | 75.8       | 74.4       | 76.3       |
| <b>TS11</b>                                   | 92.1       | 90.7       | 92.8       |
| <b>TS12</b>                                   | 136.4      | 134.9      | 137.1      |
| <b>TS13</b>                                   | 1.3        | 0.7        | 0.7        |
| <b>TS14</b>                                   | 101.6      | 100.0      | 102.3      |
| <b>TS15</b>                                   | 89.4       | 88.3       | 88.6       |
| <b>TS16</b>                                   | 118.4      | 117.3      | 118.7      |
| <b>TS17</b>                                   | 118.1      | 117.1      | 118.4      |
| <b>TS18</b>                                   | 52.1       | 50.6       | 52.7       |
| <b>TS19</b>                                   | 123.0      | 121.9      | 122.8      |

**Table S3** Total electronic energies with ZPVE correction (E, in a.u.), ZPVE (in a.u.), enthalpies (H, in a.u., 298.15 K), and Gibbs free energies (G, in a.u., 298.15 K) of the [H,Mg,N,C,O] isomers and TSs in electronic triplet states computed at the M06-2X/*aug-cc-pVTZ* level of theory

| Species                                      | ZPVE     | E           | H           | G           |
|----------------------------------------------|----------|-------------|-------------|-------------|
| <b>1t</b>                                    | 0.023141 | -368.696003 | -368.690726 | -368.723839 |
| <b>2t</b>                                    | 0.022434 | -368.686903 | -368.681375 | -368.715322 |
| <b>3t</b>                                    | 0.021926 | -368.680393 | -368.674925 | -368.708670 |
| <b>4t</b>                                    | 0.021773 | -368.673782 | -368.668233 | -368.702134 |
| <b>5t</b>                                    | 0.022442 | -368.663970 | -368.658414 | -368.692251 |
| <b>6t</b>                                    | 0.022791 | -368.663642 | -368.658042 | -368.691969 |
| <b>7t</b>                                    | 0.021701 | -368.661829 | -368.656412 | -368.690145 |
| <b>8t</b>                                    | 0.021616 | -368.661426 | -368.655624 | -368.691137 |
| <b>9t</b>                                    | 0.022541 | -368.660585 | -368.654664 | -368.689325 |
| <b>10t</b>                                   | 0.022026 | -368.659765 | -368.653792 | -368.688883 |
| <b>11t</b>                                   | 0.018325 | -368.639294 | -368.632372 | -368.669407 |
| <b>12t</b>                                   | 0.018962 | -368.638124 | -368.631347 | -368.667844 |
| <b>13t</b>                                   | 0.019078 | -368.635618 | -368.628906 | -368.665883 |
| <b>14t</b>                                   | 0.019014 | -368.613725 | -368.606792 | -368.644572 |
| <b>15t</b>                                   | 0.017649 | -368.626406 | -368.619146 | -368.653807 |
| <b>TS1t</b>                                  | 0.012886 | -368.668019 | -368.662442 | -368.696240 |
| <b>TS2t</b>                                  | 0.022136 | -368.660038 | -368.654816 | -368.688108 |
| <b>TS3t</b>                                  | 0.021681 | -368.660795 | -368.655957 | -368.688773 |
| <b>TS4t</b>                                  | 0.016793 | -368.616516 | -368.611111 | -368.644536 |
| <b>TS5t</b>                                  | 0.014546 | -368.621863 | -368.615833 | -368.650786 |
| <b>TS6t</b>                                  | 0.020384 | -368.630272 | -368.625008 | -368.658459 |
| <b>TS7t</b>                                  | 0.021415 | -368.655270 | -368.650008 | -368.683363 |
| <b>TS8t</b>                                  | 0.020717 | -368.649997 | -368.644239 | -368.678908 |
| <b>TS9t</b>                                  | 0.017858 | -368.634127 | -368.627800 | -368.663669 |
| <b>TS10t</b>                                 | 0.019027 | -368.629021 | -368.623303 | -368.657896 |
| <b>TS11t</b>                                 | 0.017721 | -368.620677 | -368.613947 | -368.651629 |
| <b>TS12t</b>                                 | 0.015161 | -368.652919 | -368.647157 | -368.681226 |
| <b>TS13t</b>                                 | 0.020467 | -368.664212 | -368.658727 | -368.693106 |
| <b>TS14t</b>                                 | 0.020610 | -368.660870 | -368.655854 | -368.688483 |
| <b>TS15t</b>                                 | 0.021455 | -368.662023 | -368.657323 | -368.689485 |
| <b>TS16t</b>                                 | 0.016483 | -368.618784 | -368.613105 | -368.647547 |
| <b>TS17t</b>                                 | 0.018580 | -368.607218 | -368.601164 | -368.636145 |
| <b>TS18t</b>                                 | 0.016991 | -368.624275 | -368.617477 | -368.655375 |
| OH( <sup>2</sup> Π) + MgNC ( <sup>2</sup> Σ) | 0.015257 | -368.617175 | -368.608923 | -368.658632 |
| HNC( <sup>1</sup> Σ) + MgO( <sup>3</sup> Π)  | 0.017456 | -368.597878 | -368.590727 | -368.639311 |
| H( <sup>2</sup> S) + MgNCO ( <sup>2</sup> Σ) | 0.012272 | -368.641760 | -368.636611 | -368.669428 |

**Table S4** Relative electronic energies with ZPVE correction ( $\Delta E$ , in kcal mol<sup>-1</sup>), relative enthalpies ( $\Delta H$ , in kcal mol<sup>-1</sup>, 298.15 K), and relative Gibbs free energies ( $\Delta G$ , in kcal mol<sup>-1</sup>, 298.15 K) of the [H,Mg,N,C,O] isomers and TSs in electronic triplet states computed at the M06-2X/aug-cc-pVTZ level of theory. These values were calculated with respect to the lowest-lying isomer **1**

| Species                                      | $\Delta E$ | $\Delta H$ | $\Delta G$ |
|----------------------------------------------|------------|------------|------------|
| <b>1t</b>                                    | 56.4       | 55.1       | 56.8       |
| <b>2t</b>                                    | 62.1       | 61.0       | 62.1       |
| <b>3t</b>                                    | 66.2       | 65.0       | 66.3       |
| <b>4t</b>                                    | 70.4       | 69.2       | 70.4       |
| <b>5t</b>                                    | 76.5       | 75.4       | 76.6       |
| <b>6t</b>                                    | 76.7       | 75.6       | 76.8       |
| <b>7t</b>                                    | 77.9       | 76.6       | 77.9       |
| <b>8t</b>                                    | 78.1       | 77.1       | 77.3       |
| <b>9t</b>                                    | 78.6       | 77.7       | 78.4       |
| <b>10t</b>                                   | 79.1       | 78.3       | 78.7       |
| <b>11t</b>                                   | 92.0       | 91.7       | 90.9       |
| <b>12t</b>                                   | 92.7       | 92.4       | 91.9       |
| <b>13t</b>                                   | 94.3       | 93.9       | 93.2       |
| <b>14t</b>                                   | 108.0      | 107.8      | 106.5      |
| <b>15t</b>                                   | 100.1      | 99.1       | 100.7      |
| <b>TS1t</b>                                  | 74.0       | 72.9       | 74.1       |
| <b>TS2t</b>                                  | 79.0       | 77.6       | 79.2       |
| <b>TS3t</b>                                  | 78.5       | 76.9       | 78.8       |
| <b>TS4t</b>                                  | 106.3      | 105.1      | 106.5      |
| <b>TS5t</b>                                  | 102.9      | 102.1      | 102.6      |
| <b>TS6t</b>                                  | 97.7       | 96.3       | 97.8       |
| <b>TS7t</b>                                  | 82.0       | 80.7       | 82.2       |
| <b>TS8t</b>                                  | 85.3       | 84.3       | 85.0       |
| <b>TS9t</b>                                  | 95.2       | 94.6       | 94.5       |
| <b>TS10t</b>                                 | 98.4       | 97.4       | 98.2       |
| <b>TS11t</b>                                 | 103.7      | 103.3      | 102.1      |
| <b>TS12t</b>                                 | 83.4       | 82.4       | 83.5       |
| <b>TS13t</b>                                 | 76.4       | 75.2       | 76.1       |
| <b>TS14t</b>                                 | 78.5       | 77.0       | 79.0       |
| <b>TS15t</b>                                 | 77.7       | 76.1       | 78.3       |
| <b>TS16t</b>                                 | 104.9      | 103.8      | 104.7      |
| <b>TS17t</b>                                 | 112.1      | 111.3      | 111.8      |
| <b>TS18t</b>                                 | 101.4      | 101.1      | 99.7       |
| OH( <sup>2</sup> Π) + MgNC ( <sup>2</sup> Σ) | 105.9      | 106.4      | 97.7       |
| HNC( <sup>1</sup> Σ) + MgO( <sup>3</sup> Π)  | 118.0      | 117.9      | 109.8      |
| H( <sup>2</sup> S) + MgNCO ( <sup>2</sup> Σ) | 90.4       | 89.1       | 90.9       |

**Table S5** Total electronic energies with ZPVE correction (E, in a.u.) of the isomers **1**, **2**, **3**, and **4** at various levels of theory

| Level of theory                        | <b>1</b>    | <b>2</b>    | <b>3</b>    | <b>4</b>    |
|----------------------------------------|-------------|-------------|-------------|-------------|
| M06-2X/ <i>aug-cc-pVTZ</i>             | -368.786360 | -368.784672 | -368.782379 | -368.772685 |
| M06-2X/ <i>aug-cc-pVQZ</i>             | -368.796473 | -368.794675 | -368.792291 | -368.782985 |
| M06-2X/ <i>aug-cc-pV5Z</i>             | -368.802990 | -368.801427 | -368.798839 | -368.788963 |
| M06-2X/ <i>cc-pVQZ</i>                 | -368.794511 | -368.792918 | -368.790431 | -368.781539 |
| M06-2X/ <i>cc-pV5Z</i>                 | -368.802062 | -368.800601 | -368.798052 | -368.788251 |
| M06-2X/6-311++G(d,p)                   | -368.754801 | -368.751874 | -368.752524 | -368.744328 |
| M06-2X/6-311++G(2df,2pd)               | -368.768230 | -368.766690 | -368.764968 | -368.756776 |
| M06-2X/6-311G(3df,3pd)                 | -368.769132 | -368.768221 | -368.765357 | -368.756244 |
| MP2/6-311++G(2df,2pd)                  | -368.082116 | -368.081312 | -368.085286 | -368.069332 |
| MP2/6-311G(3df,3pd)                    | -368.088368 | -368.087865 | -368.090886 | -368.073860 |
| DSD-PBEP86-D3(BJ)/6-311++G(2df,2pd)    | -368.308405 | -368.306378 | -368.308706 | -368.299975 |
| DSD-PBEP86-D3(BJ)/6-311G(3df,3pd)      | -368.311636 | -368.309987 | -368.311386 | -368.301799 |
| DSD-PBEP86-D3(BJ)/6-311++G(3df,3pd)    | -368.314834 | -368.312530 | -368.315074 | -368.305895 |
| DSD-PBEP86-D3(BJ)/6-311+G(2df,2pd)     | -368.308422 | -368.306355 | -368.308693 | -368.299950 |
| revDSD-PBEP86-D3(BJ)/6-311++G(2df,2pd) | -368.300440 | -368.298315 | -368.300738 | -368.291583 |
| revDSD-PBEP86-D3(BJ)/6-311G(3df,3pd)   | -368.303748 | -368.301967 | -368.303505 | -368.293462 |
| B2PLYPD/6-311++G(d,p)                  | -368.588948 | -368.586129 | -368.590011 | -368.581483 |
| B2PLYPD/6-311++G(2df,2pd)              | -368.628146 | -368.625187 | -368.627693 | -368.619504 |
| B2PLYPD/6-311G(3df,3pd)                | -368.630120 | -368.627483 | -368.629046 | -368.620028 |
| B2PLYPD/6-311++G(3df,3pd)              | -368.633319 | -368.630076 | -368.632826 | -368.624335 |
| CCSD(T)/ <i>cc-pVQZ</i>                | -368.182521 | -368.180476 | -368.181203 | -368.166077 |
| CCSD(T)/ <i>cc-pV5Z</i>                | -368.201243 | -368.199266 | -368.199788 | -368.183738 |
| CCSD(T)/ <i>aug-cc-pVTZ</i>            | -368.143341 | -368.140944 | -368.142054 | -368.126199 |
| CCSD(T)/ <i>aug-cc-pVQZ</i>            | -368.189231 | -368.186742 | -368.187657 | -368.171621 |
| QCISD(T)/ <i>cc-pVQZ</i>               | -368.183479 | -368.181361 | -368.182051 | -368.167332 |
| QCISD(T)/ <i>aug-cc-pVTZ</i>           | -368.144384 | -368.142026 | -368.142937 | -368.127518 |
| QCISD(T)/ <i>aug-cc-pVQZ</i>           | -368.190216 | -368.187666 | -368.188400 | -368.172870 |



**Table S6** Relative energies (in kcal mol<sup>-1</sup>) of the isomers **1**, **2**, **3**, and **4** with ZPVE correction computed at various levels of theory

| Level of theory                        | <b>1</b> | <b>2</b> | <b>3</b> | <b>4</b> |
|----------------------------------------|----------|----------|----------|----------|
| M06-2X/ <i>aug-cc-pVTZ</i>             | 0.0      | 1.1      | 2.5      | 8.6      |
| M06-2X/ <i>aug-cc-pVQZ</i>             | 0.0      | 1.1      | 2.6      | 8.5      |
| M06-2X/ <i>aug-cc-pV5Z</i>             | 0.0      | 1.0      | 2.6      | 8.8      |
| M06-2X/ <i>cc-pVQZ</i>                 | 0.0      | 1.0      | 2.6      | 8.1      |
| M06-2X/ <i>cc-pV5Z</i>                 | 0.0      | 0.9      | 2.5      | 8.7      |
| M06-2X/6-311++G(d,p)                   | 0.0      | 1.8      | 1.4      | 6.6      |
| M06-2X/6-311++G(2df,2pd)               | 0.0      | 1.0      | 2.1      | 7.2      |
| M06-2X/6-311G(3df,3pd)                 | 0.0      | 0.6      | 2.4      | 8.1      |
| MP2/6-311++G(2df,2pd)                  | 0.0      | 0.5      | -2.0     | 8.0      |
| MP2/6-311G(3df,3pd)                    | 0.0      | 0.3      | -1.6     | 9.1      |
| DSD-PBEP86-D3(BJ)/6-311++G(2df,2pd)    | 0.0      | 1.3      | -0.2     | 5.3      |
| DSD-PBEP86-D3(BJ)/6-311G(3df,3pd)      | 0.0      | 1.0      | 0.2      | 6.2      |
| DSD-PBEP86-D3(BJ)/6-311++G(3df,3pd)    | 0.0      | 1.5      | -0.2     | 5.6      |
| DSD-PBEP86-D3(BJ)/6-311+G(2df,2pd)     | 0.0      | 1.3      | -0.2     | 5.3      |
| revDSD-PBEP86-D3(BJ)/6-311++G(2df,2pd) | 0.0      | 1.3      | -0.2     | 5.6      |
| revDSD-PBEP86-D3(BJ)/6-311G(3df,3pd)   | 0.0      | 1.1      | 0.2      | 6.5      |
| B2PLYPD/6-311++G(d,p)                  | 0.0      | 1.8      | -0.7     | 4.7      |
| B2PLYPD/6-311++G(2df,2pd)              | 0.0      | 1.9      | 0.3      | 5.4      |
| B2PLYPD/6-311G(3df,3pd)                | 0.0      | 1.7      | 0.7      | 6.3      |
| B2PLYPD/6-311++G(3df,3pd)              | 0.0      | 2.0      | 0.3      | 5.6      |
| CCSD(T)/ <i>cc-pVQZ</i>                | 0.0      | 1.3      | 0.8      | 10.3     |
| CCSD(T)/ <i>cc-pV5Z</i>                | 0.0      | 1.2      | 0.9      | 11.0     |
| CCSD(T)/ <i>aug-cc-pVTZ</i>            | 0.0      | 1.5      | 0.8      | 10.8     |
| CCSD(T)/ <i>aug-cc-pVQZ</i>            | 0.0      | 1.6      | 1.0      | 11.1     |
| QCISD(T)/ <i>cc-pVQZ</i>               | 0.0      | 1.3      | 0.9      | 10.1     |
| QCISD(T)/ <i>aug-cc-pVTZ</i>           | 0.0      | 1.5      | 0.9      | 10.6     |
| QCISD(T)/ <i>aug-cc-pVQZ</i>           | 0.0      | 1.6      | 1.1      | 10.9     |

**Table S7** Imaginary frequency number at various levels of theory. When the optimization towards **2** leads to the linear structure **1**, the virgule symbol ‘/’ is used

| Computational levels           | <b>1</b> | <b>2</b> | <b>3</b> | <b>4</b> |
|--------------------------------|----------|----------|----------|----------|
| CCSD(T)/ <i>cc-pVDZ</i>        | 0        | 0        | 0        | 0        |
| CCSD(T)/ <i>cc-pVTZ</i>        | 2i       | 0        | 2i       | 0        |
| CCSD(T)/ <i>cc-pVQZ</i>        | 0        | 0        | 0        | 0        |
| CCSD(T)/ <i>cc-pV5Z</i>        | 0        | 0        | 0        | 0        |
| CCSD(T)/ <i>aug-cc-pVDZ</i>    | 2i       | /        | 2i       | 0        |
| CCSD(T)/ <i>aug-cc-pVTZ</i>    | 0        | 0        | 0        | 0        |
| CCSD(T)/ <i>aug-cc-pVQZ</i>    | 0        | 0        | 0        | 0        |
| QCISD(T)/ <i>cc-pVDZ</i>       | 0        | 0        | 0        | 0        |
| QCISD(T)/ <i>cc-pVTZ</i>       | 2i       | 0        | 2i       | 0        |
| QCISD(T)/ <i>cc-pVQZ</i>       | 0        | 0        | 0        | 0        |
| QCISD(T)/ <i>cc-pV5Z</i>       | 0        | 0        | 0        | 0        |
| QCISD(T)/ <i>aug-cc-pVDZ</i>   | 2i       | /        | 2i       | 0        |
| QCISD(T)/ <i>aug-cc-pVTZ</i>   | 0        | 0        | 0        | 0        |
| QCISD(T)/ <i>aug-cc-pVQZ</i>   | 0        | 0        | 0        | 0        |
| B3LYP/6-311G(d,p)              | 2i       | /        | 2i       | 0        |
| B3LYP/6-311G(2df,p)            | 2i       | /        | 2i       | 0        |
| B3LYP/6-311G(2df,2pd)          | 2i       | /        | 2i       | 0        |
| B3LYP/6-311++G(d,p)            | 0        | /        | 0        | 0        |
| B3LYP/6-311++G(3df,3pd)        | 0        | /        | 0        | 0        |
| B3LYP/6-311G(3df,3pd)          | 0        | /        | 0        | 0        |
| B3LYP/6-311+G(3df,3pd)         | 0        | /        | 0        | 0        |
| B3LYP/6-311++G(2df,2pd)        | 0        | /        | 0        | 0        |
| B3LYP/6-311+G(2df,p)           | 0        | /        | 0        | 0        |
| B3LYP/6-311+G(2df,2p)          | 0        | /        | 0        | 0        |
| B3LYP/6-311+G(2df,2pd)         | 0        | /        | 0        | 0        |
| B3LYP/6-311+G(2d,2p)           | 2i       | /        | 0        | 0        |
| B3LYP/6-311G(2d,2p)            | 2i       | /        | 2i       | 0        |
| B3LYP/6-311++G(2d,2p)          | 2i       | /        | 0        | 0        |
| B3LYP-D3(BJ)/6-311G(d,p)       | 2i       | /        | 2i       | 0        |
| B3LYP-D3(BJ)/6-311G(2df,p)     | 2i       | /        | 2i       | 0        |
| B3LYP-D3(BJ)/6-311G(2df,2pd)   | 2i       | /        | 2i       | 0        |
| B3LYP-D3(BJ)/6-311++G(d,p)     | 0        | /        | 0        | 0        |
| B3LYP-D3(BJ)/6-311++G(3df,3pd) | 0        | /        | 0        | 0        |
| B3LYP-D3(BJ)/6-311G(3df,3pd)   | 0        | /        | 0        | 0        |
| B3LYP-D3(BJ)/6-311+G(3df,3pd)  | 0        | /        | 0        | 0        |
| B3LYP-D3(BJ)/6-311++G(2df,2pd) | 0        | /        | 0        | 0        |
| B3LYP-D3(BJ)/6-311+G(2df,p)    | 0        | /        | 0        | 0        |
| B3LYP-D3(BJ)/6-311+G(2df,2p)   | 0        | /        | 0        | 0        |
| B3LYP-D3(BJ)/6-311+G(2df,2pd)  | 0        | /        | 0        | 0        |
| B3LYP-D3(BJ)/6-311+G(2d,2p)    | 2i       | /        | 0        | 0        |
| B3LYP-D3(BJ)/6-311G(2d,2p)     | 2i       | /        | 2i       | 0        |
| B3LYP-D3(BJ)/6-311++G(2d,2p)   | 2i       | /        | 0        | 0        |
| M06-2X/ <i>cc-pVDZ</i>         | 2i       | 0        | 2i       | 0        |
| M06-2X/ <i>cc-pVTZ</i>         | 2i       | 1i       | 0        | 0        |
| M06-2X/ <i>cc-pVQZ</i>         | 0        | 0        | 0        | 0        |
| M06-2X/ <i>cc-pV5Z</i>         | 0        | 0        | 0        | 0        |
| M06-2X/ <i>aug-cc-pVDZ</i>     | 2i       | 0        | 2i       | 0        |
| M06-2X/ <i>aug-cc-pVTZ</i>     | 0        | 0        | 0        | 0        |
| M06-2X/ <i>aug-cc-pVQZ</i>     | 0        | 0        | 0        | 0        |
| M06-2X/ <i>aug-cc-pV5Z</i>     | 0        | 0        | 0        | 0        |
| MP2/6-311G(d,p)                | 2i       | 1i       | 2i       | 0        |
| MP2/6-311++G(d,p)              | 2i       | 1i       | 2i       | 0        |
| MP2/6-311G(2d,2p)              | 2i       | 0        | 2i       | 0        |

Table S7 (Continued)

| Computational levels                   | 1  | 2  | 3  | 4 |
|----------------------------------------|----|----|----|---|
| MP2/6-311+G(2d,2p)                     | 0  | 0  | 0  | 0 |
| MP2/6-311++G(2d,2p)                    | 0  | 0  | 0  | 0 |
| MP2/6-311G(2df,2pd)                    | 0  | 0  | 0  | 0 |
| MP2/6-311+G(2df,2pd)                   | 0  | 0  | 0  | 0 |
| MP2/6-311++G(2df,2pd)                  | 0  | 0  | 0  | 0 |
| MP2/6-311G(3df,3pd)                    | 0  | 0  | 0  | 0 |
| MP2/6-311+G(3df,3pd)                   | 0  | 0  | 0  | 0 |
| MP2/6-311++G(3df,3pd)                  | 0  | 0  | 0  | 0 |
| $\omega$ B97XD/6-311++G(3df,3pd)       | 0  | /  | 0  | 0 |
| $\omega$ B97XD/6-311++G(2df,2pd)       | 0  | /  | 0  | 0 |
| $\omega$ B97XD/ <i>aug-cc-pVTZ</i>     | 0  | /  | 0  | 0 |
| $\omega$ B97XD/ <i>aug-cc-pVQZ</i>     | 0  | /  | 0  | 0 |
| $\omega$ B97XD/6-311G(3df,3pd)         | 0  | /  | 0  | 0 |
| $\omega$ B97XD/6-311G(2df,2pd)         | 0  | /  | 0  | 0 |
| $\omega$ B97XD/6-311G(2d,2p)           | 0  | /  | 0  | 0 |
| $\omega$ B97XD/6-311++G(2d,2p)         | 0  | /  | 0  | 0 |
| $\omega$ B97XD/6-311++G(d,p)           | 0  | /  | 0  | 0 |
| $\omega$ B97XD/6-311G(d,p)             | 0  | /  | 0  | 0 |
| DSD-PBEP86-D3(BJ)/6-311G(d,p)          | 2i | 0  | 2i | 0 |
| DSD-PBEP86-D3(BJ)/6-311G(2df,p)        | 2i | 0  | 2i | 0 |
| DSD-PBEP86-D3(BJ)/6-311++G(d,p)        | 0  | 1i | 0  | 0 |
| DSD-PBEP86-D3(BJ)/6-311G(2df,2pd)      | 2i | 0  | 0  | 0 |
| DSD-PBEP86-D3(BJ)/6-311++G(2d,2p)      | 0  | 0  | 0  | 0 |
| DSD-PBEP86-D3(BJ)/6-311++G(2df,2pd)    | 0  | 0  | 0  | 0 |
| DSD-PBEP86-D3(BJ)/6-311++G(3df,3pd)    | 0  | 0  | 0  | 0 |
| DSD-PBEP86-D3(BJ)/6-311G(3df,3pd)      | 0  | 0  | 0  | 0 |
| DSD-PBEP86-D3(BJ)/6-311+G(3df,3pd)     | 0  | 0  | 0  | 0 |
| DSD-PBEP86-D3(BJ)/6-311+G(2df,p)       | 0  | 0  | 0  | 0 |
| DSD-PBEP86-D3(BJ)/6-311+G(2df,2p)      | 0  | 0  | 0  | 0 |
| DSD-PBEP86-D3(BJ)/6-311+G(2df,2pd)     | 0  | 0  | 0  | 0 |
| revDSD-PBEP86-D3(BJ)/6-311G(d,p)       | 2i | 0  | 2i | 0 |
| revDSD-PBEP86-D3(BJ)/6-311G(2df,p)     | 2i | 0  | 2i | 0 |
| revDSD-PBEP86-D3(BJ)/6-311++G(d,p)     | 0  | 1i | 0  | 0 |
| revDSD-PBEP86-D3(BJ)/6-311G(2df,2pd)   | 2i | 0  | 0  | 0 |
| revDSD-PBEP86-D3(BJ)/6-311++G(2d,2p)   | 0  | 0  | 0  | 0 |
| revDSD-PBEP86-D3(BJ)/6-311++G(2df,2pd) | 0  | 0  | 0  | 0 |
| revDSD-PBEP86-D3(BJ)/6-311++G(3df,3pd) | 0  | 0  | 0  | 0 |
| revDSD-PBEP86-D3(BJ)/6-311G(3df,3pd)   | 0  | 0  | 0  | 0 |
| revDSD-PBEP86-D3(BJ)/6-311+G(3df,3pd)  | 0  | 0  | 0  | 0 |
| revDSD-PBEP86-D3(BJ)/6-311+G(2df,p)    | 0  | 0  | 0  | 0 |
| revDSD-PBEP86-D3(BJ)/6-311+G(2df,2p)   | 0  | 0  | 0  | 0 |
| revDSD-PBEP86-D3(BJ)/6-311+G(2df,2pd)  | 0  | 0  | 0  | 0 |
| B2PLYPD3/6-311G(d,p)                   | 2i | 0  | 2i | 0 |
| B2PLYPD/6-311G(2df,p)                  | 2i | 0  | 2i | 0 |
| B2PLYPD/6-311G(2df,2pd)                | 2i | 0  | 2i | 0 |
| B2PLYPD/6-311G(3df,3pd)                | 0  | 0  | 0  | 0 |
| B2PLYPD/6-311++G(d,p)                  | 0  | 0  | 0  | 0 |
| B2PLYPD/6-311++G(2d,2p)                | 0  | 0  | 0  | 0 |
| B2PLYPD/6-311++G(2df,2pd)              | 0  | 0  | 0  | 0 |
| B2PLYPD/6-311++G(3df,3pd)              | 0  | 0  | 0  | 0 |
| B2PLYPD/6-311+G(3df,3pd)               | 0  | 0  | 0  | 0 |
| B2PLYPD/6-311+G(2df,p)                 | 0  | 0  | 0  | 0 |
| B2PLYPD/6-311+G(2df,2p)                | 0  | 0  | 0  | 0 |
| B2PLYPD/6-311+G(2df,2pd)               | 0  | 0  | 0  | 0 |

**Table S8** Basin charge, AIM charge, natural population charge (NPC), and Mulliken charge of the isomers **1**, **2**, **3**, **4**, and reference molecules computed at the CCSD(T)/*cc-pVQZ* level of theory

| Species                            | Atom | Basin charge | AIM charge | NPC   | Mulliken charge |
|------------------------------------|------|--------------|------------|-------|-----------------|
| HOMgNC ( <b>1</b> ) ( $^1\Sigma$ ) | H    | 0.343        | 0.657      | 0.49  | 0.22            |
|                                    | O    | 9.561        | -1.563     | -1.44 | -0.71           |
|                                    | Mg   | 10.183       | 1.815      | 1.90  | 1.04            |
|                                    | N    | 9.023        | -2.025     | -1.23 | -0.51           |
|                                    | C    | 4.882        | 1.117      | 0.28  | -0.04           |
| HOMgCN ( <b>3</b> ) ( $^1\Sigma$ ) | H    | 0.339        | 0.660      | 0.49  | 0.22            |
|                                    | O    | 9.565        | -1.567     | -1.44 | -0.70           |
|                                    | Mg   | 10.208       | 1.789      | 1.83  | 0.95            |
|                                    | C    | 5.397        | 0.602      | -0.47 | -0.25           |
|                                    | N    | 8.483        | -1.485     | -0.42 | -0.22           |
| HMgNCO ( <b>4</b> ) ( $^1\Sigma$ ) | H    | 1.789        | -0.790     | -0.74 | -0.24           |
|                                    | Mg   | 10.298       | 1.699      | 1.67  | 0.79            |
|                                    | N    | 8.956        | -1.958     | -1.26 | -0.70           |
|                                    | C    | 3.544        | 2.456      | 0.99  | 0.60            |
|                                    | O    | 9.406        | -1.408     | -0.66 | -0.44           |
| HOMgNC ( <b>2</b> ) ( $^1A$ )      | H    | 0.346        | 0.654      | 0.49  | 0.22            |
|                                    | O    | 9.557        | -1.559     | -1.43 | -0.70           |
|                                    | Mg   | 10.198       | 1.800      | 1.86  | 0.96            |
|                                    | N    | 8.901        | -1.903     | -0.97 | -0.37           |
|                                    | C    | 4.991        | 1.008      | 0.05  | -0.11           |
| NCMgCN ( $^1\Sigma$ )              | N    | 8.459        | -1.462     | -0.39 | -0.20           |
|                                    | C    | 5.413        | 0.585      | -0.47 | -0.25           |
|                                    | Mg   | 10.244       | 1.752      | 1.72  | 0.90            |
|                                    | C    | 5.413        | 0.585      | -0.47 | -0.25           |
|                                    | N    | 8.459        | -1.462     | -0.39 | -0.20           |
| CNMgNC ( $^1\Sigma$ )              | C    | 4.864        | 1.135      | 0.31  | -0.03           |
|                                    | N    | 9.037        | -2.039     | -1.24 | -0.48           |
|                                    | Mg   | 10.188       | 1.809      | 1.87  | 1.02            |
|                                    | N    | 9.037        | -2.039     | -1.24 | -0.50           |
|                                    | C    | 4.864        | 1.135      | 0.31  | -0.01           |
| HMgNC ( $^1\Sigma$ )               | H    | 1.786        | -0.787     | -0.72 | -0.23           |
|                                    | Mg   | 10.299       | 1.699      | 1.65  | 0.80            |
|                                    | N    | 9.023        | -2.025     | -1.21 | -0.52           |
|                                    | C    | 4.887        | 1.112      | 0.28  | -0.04           |
| HMgCN ( $^1\Sigma$ )               | H    | 1.787        | -0.787     | -0.71 | -0.23           |
|                                    | Mg   | 10.322       | 1.676      | 1.57  | 0.77            |
|                                    | C    | 5.400        | 0.599      | -0.44 | -0.32           |
|                                    | N    | 8.486        | -1.488     | -0.42 | -0.21           |
| HMgOH ( $^1\Sigma$ )               | H    | 1.799        | -0.799     | -0.76 | -0.26           |
|                                    | Mg   | 10.287       | 1.712      | 1.71  | 0.77            |
|                                    | O    | 9.559        | -1.560     | -1.43 | -0.71           |
|                                    | H    | 0.354        | 0.646      | 0.49  | 0.21            |
| HMgH ( $^1\Sigma$ )                | H    | 1.811        | -0.811     | -0.73 | -0.28           |
|                                    | Mg   | 10.378       | 1.621      | 1.45  | 0.56            |
|                                    | H    | 1.811        | -0.811     | -0.73 | -0.28           |
| HMg ( $^2\Sigma$ )                 | H    | 1.790        | -0.790     | -0.29 | -0.29           |
|                                    | Mg   | 11.210       | 0.790      | 0.79  | 0.29            |
| MgCN ( $^2\Sigma$ )                | Mg   | 11.096       | 0.902      | 0.94  | 0.57            |
|                                    | C    | 5.392        | 0.606      | -0.50 | -0.34           |
|                                    | N    | 8.506        | -1.508     | -0.44 | -0.23           |
| MgNC ( $^2\Sigma$ )                | Mg   | 11.068       | 0.930      | 1.00  | 0.55            |
|                                    | N    | 9.027        | -2.028     | -1.26 | -0.48           |
|                                    | C    | 4.900        | 1.099      | 0.26  | -0.07           |

**Table S8** (Continued)

| Species             | Atom | Basin charge | AIM charge | NPC   | Mulliken charge |
|---------------------|------|--------------|------------|-------|-----------------|
| MgOH ( $^2\Sigma$ ) | Mg   | 11.064       | 0.935      | 0.97  | 0.49            |
|                     | O    | 9.574        | -1.575     | -0.72 | -0.68           |
|                     | H    | 0.360        | 0.640      | 0.25  | 0.19            |
| CN                  | C    | 4.779        | 1.219      | 0.45  | 0.17            |
|                     | N    | 8.215        | -1.219     | -0.45 | -0.17           |
| HCN ( $^1\Sigma$ )  | H    | 0.787        | 0.212      | 0.23  | 0.16            |
|                     | C    | 4.801        | 1.195      | 0.11  | 0.03            |
|                     | N    | 8.403        | -1.408     | -0.34 | -0.19           |
| HNC ( $^1\Sigma$ )  | H    | 0.402        | 0.598      | 0.46  | 0.23            |
|                     | N    | 8.780        | -1.784     | -0.83 | -0.31           |
|                     | C    | 4.812        | 1.186      | 0.37  | 0.08            |

**Table S9** ELF values at BCPs for **1**, **2**, **3**, and **4** computed at the CCSD(T)/*aug-cc-pVTZ* level of theory

| Species  | Bond | ELF   |
|----------|------|-------|
| <b>1</b> | H-O  | 0.984 |
|          | O-Mg | 0.054 |
|          | Mg-N | 0.065 |
|          | N-C  | 0.535 |
| <b>2</b> | H-O  | 0.983 |
|          | O-Mg | 0.056 |
|          | Mg-N | 0.060 |
|          | N-C  | 0.547 |
| <b>3</b> | H-O  | 0.984 |
|          | O-Mg | 0.054 |
|          | Mg-C | 0.086 |
|          | C-N  | 0.477 |
| <b>4</b> | H-Mg | 0.118 |
|          | Mg-N | 0.062 |
|          | N-C  | 0.624 |
|          | C-O  | 0.488 |

**Table S10** Local topological properties (in a.u.) of the electronic charge density distribution at BCPs for **1, 2, 3, and 4** computed at the CCSD(T)/*aug-cc-pVTZ* level of theory

| Species                        | Bond | $\rho(r)$ | $\nabla^2\rho(r)$ | $V(r)$ | $G(r)$ | $ V(r) /G(r)$ | $H(r)$ |
|--------------------------------|------|-----------|-------------------|--------|--------|---------------|--------|
| HOMgNC ( <b>1</b> )            | H-O  | 0.374     | -2.892            | -0.866 | 0.072  | 12.028        | -0.795 |
|                                | O-Mg | 0.081     | 0.749             | -0.178 | 0.183  | 0.973         | 0.004  |
|                                | Mg-N | 0.064     | 0.455             | -0.111 | 0.113  | 0.982         | 0.001  |
| HO- <i>a</i> MgNC ( <b>2</b> ) | N-C  | 0.467     | -0.523            | -1.635 | 0.752  | 2.174         | -0.883 |
|                                | H-O  | 0.374     | -2.864            | -0.862 | 0.073  | 11.808        | -0.789 |
|                                | O-Mg | 0.081     | 0.726             | -0.174 | 0.178  | 0.978         | 0.004  |
| HOMgCN ( <b>3</b> )            | Mg-N | 0.053     | 0.342             | -0.083 | 0.084  | 0.988         | 0.001  |
|                                | N-C  | 0.473     | -0.600            | -1.649 | 0.750  | 2.199         | -0.900 |
|                                | H-O  | 0.374     | -2.891            | -0.866 | 0.071  | 12.197        | -0.794 |
| HMgNCO ( <b>4</b> )            | O-Mg | 0.081     | 0.747             | -0.178 | 0.182  | 0.978         | 0.004  |
|                                | Mg-C | 0.057     | 0.306             | -0.082 | 0.079  | 1.038         | -0.003 |
|                                | C-N  | 0.483     | -0.115            | -1.815 | 0.893  | 2.032         | -0.922 |
| HMgNCO ( <b>4</b> )            | H-Mg | 0.056     | 0.232             | -0.071 | 0.064  | 1.109         | -0.006 |
|                                | Mg-N | 0.066     | 0.484             | -0.118 | 0.119  | 0.992         | 0.002  |
|                                | N-C  | 0.447     | -0.916            | -1.395 | 0.583  | 2.393         | -0.812 |
|                                | C-O  | 0.451     | -0.192            | -1.605 | 0.779  | 2.060         | -0.827 |

$\rho(r)$ , electronic charge density;  $\nabla^2\rho(r)$ , Laplacian function of electronic density,  $|V(r)|/G(r)$ , relationship between the potential energy density  $V(r)$  and the Lagrangian form of kinetic energy density  $G(r)$ , define as energies density of the unit of electrons; and  $H(r)$ , total energy density, define as  $V(r) + G(r)$ .

**Table S11** Cartesian coordinates of all located stationary points optimized at the M06-2X/aug-cc-pVTZ level of theory

| Species   | Geometries                                                                                                                                              | Species   | Geometries                                                                                                                                              |
|-----------|---------------------------------------------------------------------------------------------------------------------------------------------------------|-----------|---------------------------------------------------------------------------------------------------------------------------------------------------------|
| <b>1</b>  | H 0.00000 0.00000 3.13731<br>O 0.00000 0.00000 2.19016<br>Mg 0.00000 0.00000 0.44545<br>N 0.00000 0.00000 -1.46046<br>C 0.00000 0.00000 -2.63011        | <b>2</b>  | H -0.44534 2.94917 0.00000<br>O -0.29994 2.01329 0.00000<br>Mg 0.00000 0.29444 0.00000<br>N 0.72755 -1.55403 0.00000<br>C -0.37467 -1.95176 0.00000     |
| <b>3</b>  | H 0.00000 0.00000 3.21785<br>O 0.00000 0.00000 2.27056<br>Mg 0.00000 0.00000 0.52532<br>C 0.00000 0.00000 -1.50932<br>N 0.00000 0.00000 -2.66147        | <b>4</b>  | H 0.00000 0.00000 3.55132<br>Mg 0.00000 0.00000 1.87885<br>N 0.00000 0.00000 -0.00059<br>C 0.00000 0.00000 -1.19401<br>O 0.00000 0.00000 -2.36616       |
| <b>5</b>  | H 0.00000 0.00000 3.44803<br>Mg 0.00000 0.00000 1.78326<br>O 0.00000 0.00000 -0.01925<br>C 0.00000 0.00000 -1.27754<br>N 0.00000 0.00000 -2.43255       | <b>6</b>  | Mg 2.39836 -0.01698 0.00000<br>H -0.72705 -1.82295 -0.00003<br>C -1.29158 0.05319 -0.00001<br>O -1.25338 1.21223 0.00000<br>N -1.46811 -1.14147 0.00001 |
| <b>7</b>  | Mg -2.42077 0.03949 0.00138<br>N 1.28509 1.13816 -0.01591<br>C 1.33704 -0.06809 0.00143<br>O 1.24481 -1.22354 0.00103<br>H 2.07286 1.75584 0.07791      | <b>8</b>  | H 1.99021 0.91706 -0.00000<br>N 1.11450 0.42176 -0.00000<br>C 0.00000 1.08421 -0.00000<br>O -1.11206 0.51309 -0.00000<br>Mg -0.07460 -1.20661 0.00000   |
| <b>9</b>  | Mg -0.09336 -1.14303 0.00000<br>N -1.17828 0.50441 0.00000<br>C 0.00000 0.98686 0.00000<br>H 0.16887 2.07246 0.00000<br>O 1.14992 0.27399 0.00000       | <b>10</b> | Mg -2.19781 0.02233 -0.00000<br>H 0.35275 -1.47518 0.00001<br>O 1.26285 -1.12537 0.00000<br>C 1.22787 0.16642 -0.00001<br>N 1.22156 1.31595 0.00000     |
| <b>11</b> | Mg -2.70493 0.23781 0.00914<br>O 2.27230 0.64710 -0.05399<br>H 3.03747 0.36547 0.46457<br>C 1.33439 -0.24309 -0.01281<br>N 0.46242 -0.99106 -0.00936    | <b>12</b> | Mg -1.22995 -0.16572 0.00103<br>H 1.39319 -1.58968 0.02205<br>O 0.64685 -0.97863 -0.00504<br>C 1.06961 0.39661 0.00186<br>N 0.25340 1.28967 -0.00075    |
| <b>13</b> | H 0.00000 0.00000 3.66357<br>Mg 0.00000 0.00000 1.99150<br>C 0.00000 0.00000 -0.02309<br>N 0.00000 0.00000 -1.18857<br>O 0.00000 0.00000 -2.38789       | <b>14</b> | H -0.92945 2.72456 -0.00000<br>Mg -0.13908 1.25788 -0.00000<br>O 1.08056 -0.20997 0.00000<br>N 0.00000 -0.96666 0.00000<br>C -1.00767 -1.56214 -0.00000 |
| <b>15</b> | H -2.88451 -0.25579 0.29296<br>Mg -1.24367 -0.05597 0.05090<br>N 0.69268 -0.74061 -0.27768<br>C 1.54719 -0.12120 0.37899<br>O 0.45959 0.85486 -0.15424  | <b>16</b> | Mg 2.24877 0.05587 -0.00002<br>H -0.27338 -1.34327 0.00079<br>O -1.22342 -1.11518 -0.00009<br>C -1.34477 1.36307 0.00003<br>N -1.26513 0.20227 0.00000  |
| <b>17</b> | H 2.67614 -0.91438 -0.00392<br>O 1.70865 -0.93546 0.00070<br>N 1.31785 0.32639 -0.00032<br>C 0.81728 1.37769 0.00027<br>Mg -2.53949 -0.17941 -0.00009   | <b>1t</b> | H 1.96689 0.99844 0.00000<br>N 1.13017 0.43705 0.00000<br>C 0.00000 1.08713 0.00000<br>O -1.11941 0.54542 0.00000<br>Mg -0.07690 -1.24532 0.00000       |
| <b>2t</b> | H -0.31251 1.74691 -0.00002<br>N 0.07535 0.80360 0.00000<br>C -0.80144 -0.17718 0.00003<br>O -1.98228 -0.33984 -0.00002<br>Mg 1.70433 -0.29920 -0.00001 | <b>3t</b> | Mg 1.31929 0.11639 0.04818<br>N -0.68283 1.11402 -0.09917<br>C -1.11499 -0.07713 0.08766<br>H -2.13927 -0.29030 0.41053<br>O -0.27781 -1.05522 -0.10256 |
| <b>4t</b> | H 0.94471 2.41771 0.00000<br>N 0.01211 1.99420 0.00000<br>C 0.00000 0.75719 0.00000<br>O 0.79092 -0.25641 0.00000<br>Mg -0.61307 -1.57241 0.00000       | <b>5t</b> | H -2.37124 0.45113 0.00000<br>O -1.87767 -0.38583 0.00000<br>C -0.56867 -0.10521 -0.00000<br>N 0.07863 0.94088 0.00000<br>Mg 1.68785 -0.27662 0.00000   |
| <b>6t</b> | Mg -0.45741 -1.64263 0.00000<br>H -0.93827 2.22207 0.00000<br>O -0.02279 1.92901 0.00000<br>C 0.00000 0.58039 0.00000<br>N 0.94421 -0.20357 0.00000     | <b>7t</b> | H -0.95110 -1.11779 0.94748<br>N -1.19036 -0.82435 -0.00949<br>C -0.89977 0.40030 -0.26536<br>Mg 1.21464 -0.40447 -0.04301<br>O 0.01332 1.16751 0.15341 |



Table S11 (Continued)

| Species     | Geometries                                                                                                                                              | Species     | Geometries                                                                                                                                               |
|-------------|---------------------------------------------------------------------------------------------------------------------------------------------------------|-------------|----------------------------------------------------------------------------------------------------------------------------------------------------------|
| <b>8t</b>   | Mg -1.98018 -0.15137 -0.06298<br>N -0.11363 0.30761 0.24035<br>C 1.18023 0.38675 -0.06986<br>H 1.45884 1.41792 -0.37791<br>O 2.00218 -0.50940 -0.01620  | <b>9t</b>   | Mg -2.06273 -0.03761 -0.00010<br>H 2.85761 0.38449 0.00012<br>O 2.14614 -0.26175 0.00012<br>C 0.96997 0.41465 0.00003<br>N -0.15625 -0.04672 -0.00001    |
| <b>10t</b>  | H 2.35902 -0.42499 0.00000<br>O 1.81847 -1.23441 0.00000<br>C 0.52520 -0.88077 0.00000<br>N 0.00000 0.22496 0.00000<br>Mg -1.67150 1.16751 0.00000      | <b>11t</b>  | H 0.00021 1.72592 0.54624<br>O 0.62019 1.31683 -0.08428<br>Mg 1.08220 -0.73036 0.02853<br>N -0.90788 -0.53065 -0.05114<br>C -1.93216 0.03636 0.02393     |
| <b>12t</b>  | H -0.06758 1.71547 0.41856<br>O 0.57370 1.17842 -0.06558<br>Mg 1.27751 -0.64697 0.02527<br>C -0.90909 -0.337590 -0.06731<br>N -2.05679 -0.19338 0.02954 | <b>13t</b>  | H 0.31679 -2.27207 0.00000<br>C -0.46434 -1.54181 0.00000<br>N -1.27111 -0.72991 0.00000<br>Mg 0.00000 1.33951 0.00000<br>O 1.42088 0.06977 0.00000      |
| <b>14t</b>  | H -3.03452 0.48126 0.00049<br>N -2.13595 0.04266 0.00012<br>C -1.07339 -0.40398 -0.00034<br>O 1.05347 1.20431 -0.00004<br>Mg 1.33323 -0.66588 0.00009   | <b>15t</b>  | Mg -2.55987 0.00321 0.00017<br>H 2.64024 0.00051 0.00026<br>O 3.62276 0.00333 -0.00016<br>C 0.55850 -0.00559 0.00120<br>N -0.60784 -0.00458 -0.00118     |
| <b>TS1</b>  | Mg -1.38708 -0.45542 -0.00004<br>O -0.19201 1.03176 0.00011<br>H 0.37489 1.81972 -0.00059<br>C 0.74209 -0.30229 0.00012<br>N 1.90766 -0.39929 -0.00006  | <b>TS2</b>  | Mg -0.40041 -0.13277 0.00000<br>O -2.13034 0.11036 0.00000<br>H -3.02596 0.41951 -0.00000<br>N 2.19833 0.47487 0.00000<br>C 1.58087 -0.50553 -0.00000    |
| <b>TS3</b>  | Mg -0.28646 -1.41313 -0.00000<br>H 1.41749 -0.40724 -0.00000<br>O 1.23222 0.92492 -0.00000<br>C -0.00000 0.96856 0.00000<br>N -1.11967 0.59343 0.00000  | <b>TS4</b>  | Mg -1.22884 -0.26667 0.00001<br>H -2.69199 -1.05971 -0.00003<br>O 0.12441 1.12803 -0.00000<br>C 0.95580 0.17985 -0.00000<br>N 1.52971 -0.83481 -0.00000  |
| <b>TS5</b>  | Mg -2.05083 0.00408 -0.01569<br>N -0.04112 -0.19254 0.03661<br>C 1.17038 -0.08592 0.00668<br>O 2.32267 0.07961 -0.02059<br>H -0.70583 1.17744 0.05662   | <b>TS6</b>  | Mg 1.35403 -0.34839 0.00000<br>H -0.08499 -1.51487 0.00000<br>C -0.94964 0.31091 0.00000<br>O -0.04923 1.15270 0.00000<br>N -1.43881 -0.77022 0.00000    |
| <b>TS7</b>  | Mg -1.18769 0.03146 0.00000<br>H 1.10894 1.78200 0.00006<br>O 0.46123 1.06822 -0.00001<br>C 1.13153 -0.30959 0.00001<br>N 0.38061 -1.26396 -0.00000     | <b>TS8</b>  | Mg 1.96844 -0.08942 -0.06514<br>O 0.00754 0.05263 0.18936<br>C -1.26205 -0.02420 0.03745<br>N -2.40467 -0.06161 -0.11434<br>H 0.72343 1.22853 -0.15751   |
| <b>TS9</b>  | Mg -1.68229 -0.30014 -0.00000<br>N -0.00000 1.00261 -0.00000<br>C 1.01182 0.24677 0.00000<br>O 1.58775 -0.79247 0.00000<br>H 1.41457 1.44255 -0.00000   | <b>TS10</b> | Mg -1.30088 -0.28345 0.00000<br>N 0.13056 1.29191 0.00000<br>C 1.01139 0.47721 0.00000<br>O 0.86435 -0.89393 -0.00000<br>H 1.71362 -1.35385 0.00000      |
| <b>TS11</b> | Mg 0.00000 -1.03382 -0.00000<br>H 0.63718 1.53043 0.00000<br>O 1.44596 -0.02063 -0.00000<br>C -0.41735 1.20118 0.00000<br>N -1.38583 0.54762 0.00000    | <b>TS12</b> | Mg 1.42428 -0.22508 -0.00000<br>H 0.09046 -1.50646 -0.00000<br>O -1.22194 -0.82765 -0.00000<br>C -0.22217 1.36536 0.00000<br>N -0.86760 0.37665 0.00000  |
| <b>TS13</b> | H 0.99699 2.85630 0.00000<br>O 0.56381 2.01383 0.00000<br>Mg 0.00000 0.36142 0.00000<br>N -0.78857 -1.39267 0.00000<br>C 0.00209 -2.25922 0.00000       | <b>TS14</b> | Mg 1.26771 -0.15498 0.00003<br>N -0.83546 0.27596 -0.00001<br>C -0.30042 1.32913 -0.00001<br>H 2.70544 -0.99276 -0.00017<br>O -1.28340 -0.88176 0.00000  |
| <b>TS15</b> | H 1.92791 -0.68132 -0.00078<br>N 0.70364 -1.08057 0.00011<br>C 0.96710 0.16646 0.00006<br>O 0.28049 1.20453 0.00002<br>Mg -1.24165 -0.19914 -0.00004    | <b>TS16</b> | H 2.91288 -0.60705 0.00002<br>Mg 1.31272 -0.11988 -0.00000<br>O -0.27860 0.92456 -0.00000<br>N -0.72029 -0.53861 -0.00000<br>C -1.89912 -0.26343 0.00001 |

**Table S11** (Continued)

| Species      | Geometries                                                                                                                                               | Species      | Geometries                                                                                                                                              |
|--------------|----------------------------------------------------------------------------------------------------------------------------------------------------------|--------------|---------------------------------------------------------------------------------------------------------------------------------------------------------|
| <b>TS17</b>  | H -2.84844 -0.36749 0.23969<br>Mg -1.21660 -0.06299 0.03301<br>N 0.76662 -0.89261 -0.19650<br>C 1.45797 -0.03968 0.30585<br>O 0.41669 0.95122 -0.13692   | <b>TS18</b>  | H 1.99117 0.93251 0.00000<br>N 1.09518 0.47432 0.00000<br>C 0.00000 1.08057 0.00000<br>O -1.15848 0.82878 0.00000<br>Mg -0.03246 -1.44720 0.00000       |
| <b>TS19</b>  | H 1.70012 1.95081 0.00000<br>O 1.33521 1.05624 0.00000<br>N 0.00000 1.21258 -0.00000<br>C -1.04339 0.65219 -0.00000<br>Mg -0.51012 -1.90017 0.00000      | <b>TS1t</b>  | H -2.43300 0.16931 0.00000<br>O -2.04963 -0.72512 0.00000<br>C -0.71331 -0.61184 0.00000<br>N 0.00000 0.38826 0.00000<br>Mg 1.92582 0.54874 0.00000     |
| <b>TS2t</b>  | Mg 1.93349 0.45696 0.00000<br>H -2.34427 -1.46762 0.00000<br>O -2.07107 -0.54600 0.00000<br>C -0.71485 -0.50926 0.00000<br>N 0.00000 0.48680 0.00000     | <b>TS3t</b>  | Mg 1.74438 -0.24785 0.06950<br>N 0.07161 0.75887 -0.27233<br>C -1.13374 0.37937 0.16057<br>H -1.68609 1.15016 0.73041<br>O -1.61817 -0.72054 -0.07768   |
| <b>TS4t</b>  | Mg -1.24099 -0.34141 0.03956<br>N 0.98391 -0.97085 -0.14155<br>C 0.94582 0.28985 0.05973<br>H 1.80361 -0.37089 0.69900<br>O 0.06576 1.19059 -0.06766     | <b>TS5t</b>  | H -0.25198 1.46798 -0.00081<br>O 0.95333 1.10261 0.00032<br>Mg 0.86171 -0.87117 -0.00015<br>N -1.51684 -0.49808 0.00042<br>C -1.18288 0.60861 -0.00048  |
| <b>TS6t</b>  | H 1.25549 -1.56656 0.00043<br>O 0.38336 -1.14474 -0.00003<br>C 0.53640 0.28006 -0.00026<br>N 1.62964 0.83956 0.00012<br>Mg -1.57902 0.26393 0.00005      | <b>TS7t</b>  | H 2.29191 -0.30808 0.77901<br>O 1.90577 -0.302295 -0.10497<br>C 0.56672 -0.05764 -0.00762<br>N -0.10399 0.96598 0.00182<br>Mg -1.68421 -0.30747 0.00781 |
| <b>TS8t</b>  | Mg 2.05542 0.00483 -0.00004<br>H -2.53148 -0.47319 0.67722<br>O -2.20238 -0.05663 -0.12866<br>C -0.91732 0.38374 0.09468<br>N 0.14135 -0.20489 -0.03080  | <b>TS9t</b>  | H 1.40094 1.37885 0.56377<br>O 1.52695 0.70486 -0.12759<br>Mg 0.35104 -1.03985 0.02970<br>C -1.95820 0.21706 -0.11182<br>N -0.86853 0.59401 0.11022     |
| <b>TS10t</b> | Mg -1.29578 -0.35549 -0.00005<br>N 0.92740 -0.97774 0.00012<br>C 1.39809 0.08443 -0.00014<br>H 2.11040 0.88266 -0.00012<br>O -0.18017 1.21510 0.00008    | <b>TS11t</b> | Mg 2.08591 -0.32360 0.00001<br>H -3.04983 0.16728 0.00107<br>O -2.43383 -0.57939 -0.00009<br>C -0.80240 0.79825 -0.00018<br>N 0.32914 0.50878 0.00009   |
| <b>TS12t</b> | H -0.49175 1.31130 -0.00153<br>Mg -2.02918 -0.07964 -0.00102<br>N -0.07013 0.06845 0.00283<br>C 1.14045 -0.09515 0.00142<br>O 2.31126 -0.03298 -0.00183  | <b>TS13t</b> | H 0.06802 1.64135 -0.29349<br>N 0.07519 0.72907 0.15827<br>C -0.96119 -0.04236 -0.33018<br>O -2.00263 -0.35568 0.13360<br>Mg 1.76616 -0.30377 0.00816   |
| <b>TS14t</b> | H -0.77259 -1.42658 0.90596<br>N -0.76569 -1.06605 -0.04603<br>C -1.01332 0.21653 -0.19736<br>Mg 1.23089 -0.16510 -0.02981<br>O -0.31980 1.19638 0.11977 | <b>TS15t</b> | H -1.07368 -1.08910 0.92083<br>N -1.33879 -0.73660 -0.00913<br>C -0.89583 0.42847 -0.26865<br>Mg 1.25823 -0.43524 -0.04345<br>O 0.09018 1.11217 0.15954 |
| <b>TS16t</b> | Mg -1.95309 -0.19227 -0.05158<br>N -0.11779 0.36223 0.25678<br>C 1.12791 0.24319 -0.11630<br>H 0.39506 1.28947 -0.46899<br>O 2.13738 -0.37212 -0.00146   | <b>TS17t</b> | H 2.90227 0.23024 0.00012<br>N 2.00242 -0.20319 -0.00004<br>C 0.85393 -0.38419 0.00003<br>O -0.45327 1.09985 -0.00000<br>Mg -1.53472 -0.44180 -0.00000  |
| <b>TS18t</b> | Mg -1.87407 0.62303 -0.00013<br>H 2.41300 -0.20820 -0.00036<br>O 2.58279 0.75420 0.00008<br>C 0.52646 -1.28541 -0.00047<br>N -0.53503 -0.79847 0.00058   |              |                                                                                                                                                         |
